# Supplementary material
Source: publisher site journal article supplement (http://www.spandidos-publications.com/1029/downloadSupplementary)
Supplement: Supplementary file 1 [file downloadSupplementary]

## Sheet: Sheet2
Table S3. Expression levels of the 4,195 mRNAs were significantly correlated with the 9 lncRNAs.
lncRNA	mRNA	HR	P-value	FDR
284029	399	0.688505	0	0
284029	84824	0.685259	0	0
105221694	684	0.714024	0	0
105221694	3430	0.717337	0	0
105221694	4939	0.705185	0	0
105221694	6737	0.684897	0	0
105221694	9246	0.697717	0	0
105221694	54625	0.716368	0	0
105221694	64761	0.692646	0	0
105221694	83666	0.686194	0	0
105221694	219285	0.721928	0	0
284029	55843	0.670734	1.11e-15	8.79e-13
105221694	8638	0.669152	1.33e-15	1.02e-12
101929504	22801	0.66741	1.78e-15	1.33e-12
105221694	54809	0.667004	1.78e-15	1.33e-12
105221694	4938	0.661284	3.77e-15	2.7e-12
105221694	55008	0.656613	6.66e-15	4.62e-12
105221694	79132	0.654926	8.44e-15	5.8e-12
105221694	3665	0.654631	8.66e-15	5.94e-12
284029	81793	0.654586	8.88e-15	6.04e-12
105221694	3669	0.653902	9.55e-15	6.46e-12
101929504	6320	0.649129	1.73e-14	1.1e-11
105221694	3902	0.648225	1.91e-14	1.21e-11
105221694	55601	0.646788	2.31e-14	1.43e-11
101929504	27286	0.645819	2.58e-14	1.58e-11
105221694	27074	0.645573	2.66e-14	1.63e-11
101929504	10699	0.645135	2.8e-14	1.71e-11
105221694	4599	0.640517	4.88e-14	2.84e-11
105221694	94240	0.639548	5.46e-14	3.1e-11
105221694	151636	0.639066	5.77e-14	3.25e-11
284029	3820	0.638783	6e-14	3.35e-11
105221694	29851	0.636255	8.04e-14	4.36e-11
105221694	3431	0.635969	8.33e-14	4.5e-11
284029	326624	0.635821	8.48e-14	4.57e-11
284029	9535	0.63143	1.41e-13	7.34e-11
101929504	9622	0.630108	1.64e-13	8.41e-11
284029	2841	0.627336	2.25e-13	1.12e-10
105221694	51191	0.626271	2.54e-13	1.25e-10
284029	912	0.624316	3.16e-13	1.53e-10
101929504	84620	0.621749	4.21e-13	1.99e-10
105221694	4600	0.62153	4.31e-13	2.03e-10
105221694	4940	0.620704	4.72e-13	2.21e-10
284029	151888	0.619745	5.25e-13	2.43e-10
105221694	84166	0.619337	5.49e-13	2.53e-10
284029	1731	0.617896	6.43e-13	2.92e-10
101929504	1289	0.616147	7.78e-13	3.48e-10
221883	56667	0.615448	8.4e-13	3.74e-10
101929504	51226	0.613103	1.08e-12	4.76e-10
284029	132160	0.610401	1.45e-12	6.23e-10
284029	79368	0.607649	1.94e-12	8.2e-10
105221694	6772	0.60763	1.94e-12	8.2e-10
284029	84541	0.607321	2e-12	8.46e-10
105221694	60489	0.607106	2.05e-12	8.64e-10
105221694	84941	0.607055	2.06e-12	8.68e-10
105221694	91351	0.606279	2.24e-12	9.37e-10
29034	79574	0.60587	2.33e-12	9.75e-10
284029	1043	0.604134	2.8e-12	1.16e-09
284029	23526	0.603391	3.02e-12	1.24e-09
105221694	10561	0.601274	3.77e-12	1.51e-09
284029	139716	0.600841	3.94e-12	1.58e-09
284029	640	0.600441	4.11e-12	1.63e-09
105221694	3434	0.599461	4.54e-12	1.8e-09
284029	969	0.599323	4.61e-12	1.82e-09
105221694	115361	0.599224	4.65e-12	1.83e-09
105221694	57674	0.598504	5.01e-12	1.97e-09
105221694	3702	0.598479	5.02e-12	1.97e-09
284029	80008	0.598339	5.09e-12	1.99e-09
101929504	114904	0.598177	5.18e-12	2.01e-09
105221694	5698	0.596603	6.08e-12	2.35e-09
284029	348378	0.596068	6.42e-12	2.47e-09
284029	154	0.595801	6.59e-12	2.53e-09
100131208	54531	0.594097	7.83e-12	2.98e-09
284029	53829	0.593889	8e-12	3.04e-09
284029	114836	0.593819	8.06e-12	3.05e-09
105221694	9881	0.593656	8.19e-12	3.09e-09
105221694	834	0.590678	1.1e-11	4.06e-09
105221694	6402	0.59036	1.14e-11	4.19e-09
105221694	197135	0.589968	1.18e-11	4.34e-09
284029	10148	0.58966	1.22e-11	4.46e-09
101929504	94031	0.589364	1.26e-11	4.59e-09
105221694	3594	0.589331	1.26e-11	4.6e-09
284029	286530	0.588867	1.32e-11	4.79e-09
105221694	9636	0.588168	1.42e-11	5.12e-09
105221694	10563	0.587908	1.45e-11	5.24e-09
221883	337	0.586927	1.6e-11	5.71e-09
284029	5579	0.586177	1.72e-11	6.12e-09
284029	608	0.585163	1.9e-11	6.67e-09
101929504	114899	0.584997	1.93e-11	6.76e-09
105221694	4068	0.584903	1.95e-11	6.81e-09
105221694	129607	0.584894	1.95e-11	6.81e-09
100131208	57610	0.584681	1.99e-11	6.93e-09
284029	57559	0.584591	2.01e-11	6.99e-09
105221694	952	0.583997	2.13e-11	7.36e-09
284029	9363	0.583942	2.14e-11	7.39e-09
284029	974	0.582172	2.54e-11	8.64e-09
284029	79958	0.581983	2.59e-11	8.78e-09
105221694	23424	0.581957	2.6e-11	8.8e-09
105221694	116071	0.581941	2.6e-11	8.8e-09
105221694	10507	0.581838	2.63e-11	8.87e-09
105221694	201633	0.58177	2.64e-11	8.92e-09
101929504	50863	0.58108	2.83e-11	9.46e-09
105221694	3429	0.581102	2.82e-11	9.46e-09
221883	11074	0.580096	3.11e-11	1.03e-08
284029	202309	0.579693	3.23e-11	1.07e-08
105221694	3620	0.578795	3.52e-11	1.16e-08
105221694	1234	0.578302	3.69e-11	1.21e-08
284029	930	0.578209	3.72e-11	1.22e-08
101929504	1009	0.577953	3.81e-11	1.24e-08
101929504	51339	0.577927	3.82e-11	1.24e-08
105221694	24138	0.577569	3.96e-11	1.29e-08
105221694	5920	0.577047	4.16e-11	1.35e-08
101929504	54829	0.577018	4.17e-11	1.35e-08
105221694	10875	0.576952	4.2e-11	1.36e-08
284029	9214	0.575915	4.63e-11	1.48e-08
105221694	23586	0.575325	4.89e-11	1.56e-08
284029	53347	0.575172	4.97e-11	1.58e-08
105221694	10384	0.574827	5.13e-11	1.62e-08
105221694	3659	0.57481	5.14e-11	1.62e-08
105221694	6352	0.573874	5.61e-11	1.76e-08
105221694	80830	0.573885	5.61e-11	1.76e-08
284029	695	0.573662	5.73e-11	1.79e-08
105221694	51316	0.573533	5.8e-11	1.81e-08
284029	8875	0.572119	6.62e-11	2.04e-08
101929504	8038	0.57211	6.62e-11	2.04e-08
221883	79853	0.57167	6.9e-11	2.12e-08
105221694	3560	0.571623	6.93e-11	2.13e-08
284029	5026	0.571584	6.96e-11	2.13e-08
101929504	2615	0.570808	7.48e-11	2.29e-08
105221694	10068	0.570637	7.6e-11	2.32e-08
105221694	3561	0.570538	7.67e-11	2.34e-08
84793	121256	0.570384	7.78e-11	2.36e-08
284029	257144	0.570325	7.82e-11	2.37e-08
105221694	3437	0.570024	8.04e-11	2.44e-08
284029	50852	0.569985	8.07e-11	2.44e-08
284029	8115	0.56961	8.36e-11	2.51e-08
101929504	5654	0.568986	8.85e-11	2.65e-08
284029	55024	0.568046	9.66e-11	2.87e-08
105221694	10964	0.567867	9.82e-11	2.91e-08
105221694	5778	0.567548	1.01e-10	2.99e-08
284029	931	0.5674	1.03e-10	3.02e-08
84793	2301	0.567049	1.06e-10	3.12e-08
284029	64333	0.566525	1.11e-10	3.26e-08
284029	911	0.566453	1.12e-10	3.28e-08
105221694	22797	0.566428	1.12e-10	3.29e-08
284029	11184	0.564094	1.39e-10	4.02e-08
101929504	54587	0.5639	1.41e-10	4.07e-08
105221694	942	0.563671	1.44e-10	4.16e-08
100131208	168850	0.563087	1.52e-10	4.37e-08
101929504	145407	0.562983	1.53e-10	4.41e-08
284029	5777	0.562186	1.65e-10	4.68e-08
105221694	79961	0.56182	1.71e-10	4.83e-08
105221694	124460	0.561337	1.78e-10	5.03e-08
105221694	914	0.561321	1.78e-10	5.03e-08
284029	9450	0.560288	1.96e-10	5.5e-08
284029	333929	0.560138	1.98e-10	5.56e-08
101929504	165	0.560135	1.98e-10	5.56e-08
284029	26279	0.559561	2.09e-10	5.83e-08
101929504	3693	0.559382	2.12e-10	5.92e-08
284029	83953	0.55898	2.2e-10	6.13e-08
29034	51208	0.558733	2.25e-10	6.26e-08
105221694	91543	0.558216	2.36e-10	6.54e-08
105221694	8542	0.557938	2.42e-10	6.7e-08
284029	933	0.55766	2.48e-10	6.85e-08
105221694	2833	0.557226	2.57e-10	7.1e-08
105221694	151888	0.556895	2.65e-10	7.29e-08
284029	26051	0.556788	2.68e-10	7.34e-08
101929504	1290	0.556011	2.87e-10	7.79e-08
105221694	55423	0.555886	2.9e-10	7.87e-08
221883	79574	0.55511	3.11e-10	8.36e-08
105221694	50615	0.554817	3.19e-10	8.57e-08
284029	374403	0.553186	3.68e-10	9.78e-08
105221694	10673	0.55308	3.71e-10	9.86e-08
105221694	843	0.552654	3.85e-10	1.02e-07
284029	4066	0.552489	3.91e-10	1.03e-07
101929504	10234	0.551769	4.17e-10	1.09e-07
284029	1380	0.550713	4.57e-10	1.19e-07
105221694	695	0.550639	4.6e-10	1.2e-07
29034	1179	0.550221	4.77e-10	1.24e-07
100131208	150160	0.55008	4.83e-10	1.26e-07
105221694	30009	0.548891	5.35e-10	1.39e-07
105221694	5450	0.548606	5.48e-10	1.42e-07
105221694	3134	0.548581	5.5e-10	1.42e-07
101929504	25903	0.548545	5.51e-10	1.42e-07
101929504	4016	0.548416	5.57e-10	1.44e-07
105221694	9447	0.548253	5.65e-10	1.45e-07
105221694	3627	0.54794	5.81e-10	1.49e-07
101929504	79953	0.547924	5.82e-10	1.49e-07
105221694	55281	0.54647	6.59e-10	1.68e-07
105221694	729230	0.545658	7.07e-10	1.8e-07
101929504	54551	0.54536	7.25e-10	1.84e-07
105221694	6373	0.545362	7.25e-10	1.84e-07
284029	2123	0.545045	7.45e-10	1.89e-07
105221694	25816	0.544433	7.85e-10	1.98e-07
101929504	9891	0.544232	7.98e-10	2.01e-07
101929504	1462	0.543877	8.23e-10	2.06e-07
284029	29760	0.543731	8.33e-10	2.08e-07
105221694	9404	0.543155	8.75e-10	2.18e-07
284029	64926	0.542892	8.95e-10	2.22e-07
101929504	1300	0.542902	8.94e-10	2.22e-07
105221694	915	0.542854	8.98e-10	2.23e-07
284029	285195	0.542756	9.05e-10	2.25e-07
101929504	51148	0.541858	9.77e-10	2.41e-07
105221694	26191	0.541566	1e-09	2.47e-07
101929504	83468	0.541491	1.01e-09	2.48e-07
105221694	3002	0.541175	1.03e-09	2.54e-07
221883	5948	0.541081	1.04e-09	2.56e-07
101929504	4958	0.540938	1.06e-09	2.58e-07
105221694	80833	0.540555	1.09e-09	2.66e-07
105221694	11274	0.540068	1.14e-09	2.75e-07
100131208	10811	0.539992	1.14e-09	2.77e-07
105221694	6672	0.539798	1.16e-09	2.8e-07
105221694	64092	0.539592	1.18e-09	2.84e-07
105221694	7098	0.53949	1.19e-09	2.86e-07
284029	27240	0.539475	1.19e-09	2.86e-07
284029	64174	0.539434	1.2e-09	2.87e-07
105221694	64108	0.538998	1.24e-09	2.98e-07
284029	2833	0.538852	1.26e-09	3.01e-07
101929504	196051	0.538778	1.27e-09	3.02e-07
84793	245806	0.538548	1.29e-09	3.08e-07
221883	3209	0.538249	1.32e-09	3.15e-07
101929504	4148	0.538141	1.33e-09	3.17e-07
105221694	4818	0.53809	1.34e-09	3.18e-07
284029	4049	0.537896	1.36e-09	3.23e-07
284029	158830	0.537314	1.43e-09	3.37e-07
284029	128611	0.537152	1.45e-09	3.41e-07
100131208	64853	-0.537112	1.45e-09	3.42e-07
105221694	5721	0.53701	1.47e-09	3.45e-07
105221694	29909	0.536931	1.48e-09	3.47e-07
101929504	91179	0.536847	1.49e-09	3.49e-07
284029	54900	0.536748	1.5e-09	3.51e-07
284029	79626	0.536692	1.51e-09	3.53e-07
284029	915	0.536234	1.56e-09	3.66e-07
284029	1540	0.535971	1.6e-09	3.73e-07
105221694	919	0.535778	1.62e-09	3.79e-07
284029	340152	0.535556	1.66e-09	3.84e-07
105221694	55303	0.535486	1.66e-09	3.86e-07
105221694	114769	0.53538	1.68e-09	3.89e-07
105221694	55824	0.535198	1.7e-09	3.95e-07
84793	54535	0.534661	1.78e-09	4.12e-07
101929504	2200	0.53464	1.79e-09	4.12e-07
284029	2124	0.534118	1.86e-09	4.27e-07
284029	286336	0.533725	1.93e-09	4.4e-07
105221694	2643	0.533654	1.94e-09	4.43e-07
105221694	3587	0.533344	1.99e-09	4.53e-07
105221694	55843	0.533299	1.99e-09	4.54e-07
100131208	1406	0.533183	2.01e-09	4.57e-07
105221694	3001	0.532752	2.09e-09	4.72e-07
284029	64744	0.532684	2.1e-09	4.73e-07
105221694	26279	0.532676	2.1e-09	4.73e-07
284029	973	0.532482	2.13e-09	4.81e-07
105221694	3683	0.532282	2.17e-09	4.87e-07
100131208	152006	-0.532255	2.17e-09	4.88e-07
105221694	1236	0.531848	2.25e-09	5.04e-07
105221694	5880	0.531213	2.37e-09	5.29e-07
105221694	5696	0.531196	2.37e-09	5.29e-07
105221694	11040	0.531126	2.38e-09	5.32e-07
29034	56000	0.53064	2.48e-09	5.52e-07
101929504	24141	0.530561	2.5e-09	5.55e-07
105221694	2841	0.530528	2.5e-09	5.56e-07
284029	51284	0.529958	2.62e-09	5.81e-07
284029	4063	0.52961	2.7e-09	5.96e-07
284029	54851	0.52961	2.7e-09	5.96e-07
221883	3207	0.529391	2.74e-09	6.05e-07
284029	8869	0.529232	2.78e-09	6.12e-07
221883	1179	0.52915	2.8e-09	6.14e-07
84793	116028	0.529103	2.81e-09	6.16e-07
284029	64115	0.529061	2.82e-09	6.18e-07
284029	203328	0.529037	2.82e-09	6.18e-07
284029	26228	0.528875	2.86e-09	6.24e-07
105221694	146722	0.52856	2.94e-09	6.4e-07
284029	84433	0.528127	3.04e-09	6.62e-07
284029	729230	0.528009	3.07e-09	6.67e-07
101929504	6678	0.527944	3.09e-09	6.7e-07
284029	80709	0.527915	3.09e-09	6.71e-07
105221694	2537	0.527877	3.1e-09	6.72e-07
284029	55423	0.527261	3.26e-09	7.03e-07
284029	147138	0.527213	3.27e-09	7.05e-07
284029	9051	0.527172	3.28e-09	7.07e-07
101929504	4920	0.526862	3.37e-09	7.22e-07
284029	81704	0.526768	3.39e-09	7.25e-07
105221694	653361	0.526776	3.39e-09	7.25e-07
101929504	2922	0.526698	3.41e-09	7.29e-07
105221694	26270	0.526046	3.6e-09	7.68e-07
221883	9032	0.525949	3.62e-09	7.71e-07
284029	51231	0.525969	3.62e-09	7.71e-07
221883	342979	0.525632	3.72e-09	7.88e-07
221883	2638	0.525291	3.82e-09	8.07e-07
105221694	26157	0.525136	3.87e-09	8.16e-07
221883	284422	0.524961	3.92e-09	8.27e-07
105221694	152926	0.52441	4.1e-09	8.62e-07
105221694	941	0.524242	4.16e-09	8.73e-07
105221694	51703	0.524115	4.2e-09	8.8e-07
105221694	197259	0.524091	4.21e-09	8.81e-07
105221694	3601	0.523923	4.26e-09	8.91e-07
284029	3087	0.523738	4.33e-09	9.03e-07
105221694	57169	0.523745	4.32e-09	9.03e-07
284029	2517	0.523517	4.4e-09	9.15e-07
101929504	57608	0.523421	4.44e-09	9.21e-07
105221694	10906	0.522856	4.64e-09	9.61e-07
100131208	65977	-0.522761	4.68e-09	9.68e-07
284029	64098	0.522625	4.73e-09	9.78e-07
105221694	497189	0.522322	4.84e-09	1e-06
100131067	345778	0.522177	4.9e-09	1.01e-06
105221694	4689	0.522113	4.92e-09	1.02e-06
221883	8431	0.521535	5.15e-09	1.06e-06
105221694	10346	0.521443	5.19e-09	1.07e-06
221883	140453	0.521279	5.26e-09	1.08e-06
101929504	649	0.521273	5.26e-09	1.08e-06
105221694	3394	0.521071	5.35e-09	1.09e-06
221883	56000	0.520994	5.38e-09	1.1e-06
284029	88455	0.520226	5.71e-09	1.16e-06
105221694	57486	-0.520214	5.72e-09	1.16e-06
29034	5948	0.520121	5.76e-09	1.17e-06
100131208	10447	-0.520037	5.8e-09	1.18e-06
284029	951	0.519837	5.89e-09	1.19e-06
84793	1869	0.5195	6.05e-09	1.22e-06
101929504	90993	0.519475	6.06e-09	1.22e-06
284029	55303	0.519262	6.17e-09	1.24e-06
105221694	6404	0.519258	6.17e-09	1.24e-06
284029	92241	0.519158	6.22e-09	1.25e-06
284029	3109	0.518997	6.3e-09	1.26e-06
29034	79853	0.518981	6.3e-09	1.26e-06
105221694	8807	0.518836	6.38e-09	1.27e-06
284029	150365	0.518727	6.43e-09	1.28e-06
284029	51411	0.518652	6.47e-09	1.29e-06
105221694	925	0.518168	6.72e-09	1.33e-06
284029	79961	0.518034	6.79e-09	1.35e-06
101929504	2042	0.51798	6.82e-09	1.35e-06
105221694	4283	0.517978	6.82e-09	1.35e-06
284029	1512	0.517699	6.97e-09	1.38e-06
29034	29974	0.517455	7.1e-09	1.4e-06
100131208	64137	0.517278	7.2e-09	1.42e-06
105221694	116984	0.516899	7.42e-09	1.46e-06
284029	3957	0.516712	7.53e-09	1.47e-06
105221694	3579	0.516539	7.63e-09	1.49e-06
105221694	3108	0.516445	7.69e-09	1.5e-06
105221694	89857	0.516415	7.7e-09	1.51e-06
105221694	330	0.516336	7.75e-09	1.51e-06
101929504	254228	0.516322	7.76e-09	1.51e-06
105221694	1439	0.516016	7.95e-09	1.55e-06
29034	11074	0.515759	8.11e-09	1.57e-06
29034	2638	0.515409	8.33e-09	1.61e-06
284029	2322	0.515268	8.42e-09	1.63e-06
284029	91526	0.515012	8.59e-09	1.66e-06
105221694	7318	0.514873	8.68e-09	1.67e-06
284029	6039	0.514728	8.78e-09	1.68e-06
105221694	50852	0.514598	8.87e-09	1.7e-06
221883	8856	0.51458	8.88e-09	1.7e-06
221883	248	0.514119	9.2e-09	1.76e-06
221883	84699	0.514031	9.27e-09	1.77e-06
105221694	11184	0.513884	9.37e-09	1.79e-06
100131208	80724	0.513644	9.55e-09	1.82e-06
105221694	51411	0.513071	9.98e-09	1.89e-06
105221694	64333	0.512673	1.03e-08	1.95e-06
101929504	1293	0.512656	1.03e-08	1.95e-06
284029	63940	0.512546	1.04e-08	1.96e-06
105221694	81704	0.512445	1.05e-08	1.98e-06
100131208	10137	-0.512263	1.06e-08	2e-06
105221694	23526	0.512254	1.06e-08	2e-06
100131208	5358	-0.512112	1.07e-08	2.02e-06
29034	79908	0.511975	1.09e-08	2.04e-06
105221694	340152	0.511886	1.09e-08	2.05e-06
101929504	55568	0.511516	1.12e-08	2.1e-06
84793	55723	0.511405	1.13e-08	2.12e-06
105221694	9056	0.511304	1.14e-08	2.13e-06
105221694	54855	0.511236	1.15e-08	2.14e-06
105221694	51296	0.511185	1.15e-08	2.15e-06
284029	8320	0.511171	1.15e-08	2.15e-06
100131208	57590	-0.511165	1.16e-08	2.15e-06
105221694	8530	0.511089	1.16e-08	2.16e-06
105221694	27334	0.510902	1.18e-08	2.18e-06
29034	6476	0.510761	1.19e-08	2.2e-06
221883	3170	0.510735	1.19e-08	2.2e-06
284029	8631	0.510703	1.2e-08	2.2e-06
105221694	1536	0.510511	1.21e-08	2.23e-06
284029	124460	0.510399	1.23e-08	2.25e-06
101929504	10418	0.510334	1.23e-08	2.26e-06
105221694	85441	0.509931	1.27e-08	2.33e-06
284029	133418	0.509661	1.3e-08	2.37e-06
284029	51676	0.50911	1.35e-08	2.46e-06
105221694	286530	0.509096	1.35e-08	2.46e-06
105221694	8320	0.508926	1.37e-08	2.49e-06
105221694	64098	0.508874	1.38e-08	2.5e-06
284029	26157	0.508855	1.38e-08	2.5e-06
105221694	313	0.508518	1.41e-08	2.56e-06
84793	92369	0.508204	1.45e-08	2.62e-06
105221694	200315	0.508054	1.46e-08	2.64e-06
221883	3816	0.507656	1.51e-08	2.71e-06
100131208	84069	0.507642	1.51e-08	2.71e-06
284029	57121	0.507583	1.52e-08	2.72e-06
284029	9840	0.507457	1.53e-08	2.75e-06
105221694	27299	0.507267	1.55e-08	2.78e-06
284029	91523	0.507093	1.57e-08	2.82e-06
105221694	283897	0.507072	1.58e-08	2.82e-06
284029	3059	0.507001	1.59e-08	2.83e-06
100131208	63977	0.506885	1.6e-08	2.85e-06
100131208	2116	0.506853	1.6e-08	2.85e-06
284029	29909	0.506823	1.61e-08	2.86e-06
100131208	347862	0.506753	1.62e-08	2.87e-06
101929504	93166	0.506754	1.62e-08	2.87e-06
100131208	51286	0.506686	1.62e-08	2.88e-06
100131208	57572	0.506512	1.65e-08	2.91e-06
101929504	192668	0.506441	1.65e-08	2.93e-06
284029	10170	0.50586	1.73e-08	3.05e-06
284029	57699	0.505692	1.75e-08	3.09e-06
284029	963	0.505268	1.81e-08	3.18e-06
105221694	3433	0.505241	1.81e-08	3.19e-06
101929504	337876	0.504848	1.86e-08	3.28e-06
284029	3394	0.504734	1.88e-08	3.3e-06
101929504	54796	0.504669	1.89e-08	3.31e-06
105221694	3512	0.504652	1.89e-08	3.31e-06
101929504	57537	0.504595	1.9e-08	3.32e-06
100131208	55754	-0.504526	1.91e-08	3.33e-06
101929504	84662	0.50442	1.93e-08	3.36e-06
100131208	284004	0.503959	1.99e-08	3.47e-06
105221694	3937	0.503897	2e-08	3.48e-06
100131208	1053	0.503804	2.02e-08	3.5e-06
284029	27334	0.503454	2.07e-08	3.59e-06
284029	9595	0.503363	2.08e-08	3.61e-06
284029	4068	0.503262	2.1e-08	3.63e-06
101929504	148113	0.503222	2.11e-08	3.64e-06
284029	5368	0.50321	2.11e-08	3.64e-06
100131208	122616	0.503199	2.11e-08	3.64e-06
101929504	4320	0.502964	2.15e-08	3.69e-06
84793	26548	0.502735	2.18e-08	3.75e-06
101929504	5099	0.502573	2.21e-08	3.79e-06
100131208	7779	-0.50241	2.24e-08	3.82e-06
284029	9404	0.502293	2.26e-08	3.85e-06
105221694	6614	0.502217	2.27e-08	3.87e-06
100131208	50807	-0.50213	2.28e-08	3.89e-06
100131208	90411	-0.502035	2.3e-08	3.91e-06
101929504	6695	0.50204	2.3e-08	3.91e-06
101929504	1278	0.501947	2.32e-08	3.93e-06
101929504	11117	0.501742	2.35e-08	3.98e-06
105221694	5720	0.501239	2.44e-08	4.13e-06
284029	6404	0.501152	2.46e-08	4.15e-06
105221694	2124	0.500899	2.5e-08	4.22e-06
101929504	4323	0.500887	2.51e-08	4.22e-06
284029	6367	0.50073	2.53e-08	4.27e-06
105221694	255231	0.500669	2.55e-08	4.28e-06
221883	54825	0.500525	2.57e-08	4.32e-06
284029	2185	0.50039	2.6e-08	4.36e-06
100131208	3685	-0.500205	2.64e-08	4.41e-06
105221694	56253	0.500155	2.65e-08	4.42e-06
105221694	79958	0.500149	2.65e-08	4.42e-06
101929504	219699	0.500031	2.67e-08	4.46e-06
284029	23643	0.499818	2.71e-08	4.52e-06
101929504	50507	0.499683	2.74e-08	4.56e-06
105221694	81030	0.499607	2.75e-08	4.59e-06
284029	91937	0.499472	2.78e-08	4.63e-06
100131208	55191	0.499455	2.79e-08	4.63e-06
29034	83998	0.499426	2.79e-08	4.64e-06
100131208	51052	0.499017	2.88e-08	4.77e-06
105221694	6039	0.498898	2.9e-08	4.8e-06
100131208	84787	0.498429	3e-08	4.96e-06
84793	27294	0.498357	3.02e-08	4.98e-06
284029	51237	0.498285	3.04e-08	5e-06
29034	3960	0.498103	3.08e-08	5.06e-06
284029	3001	0.498078	3.08e-08	5.07e-06
284029	221472	0.497763	3.15e-08	5.18e-06
100131208	4780	-0.497706	3.17e-08	5.19e-06
284029	219972	0.497417	3.24e-08	5.29e-06
105221694	2633	0.497226	3.28e-08	5.36e-06
105221694	6891	0.497105	3.31e-08	5.4e-06
284029	257106	0.497067	3.32e-08	5.41e-06
100131208	286410	-0.496975	3.34e-08	5.43e-06
101929504	3751	0.496974	3.34e-08	5.43e-06
284029	3594	0.49675	3.4e-08	5.51e-06
221883	51208	0.496655	3.42e-08	5.55e-06
221883	83998	0.496424	3.48e-08	5.63e-06
100131208	199731	0.49635	3.5e-08	5.65e-06
29034	27290	0.49608	3.57e-08	5.75e-06
105221694	83416	0.49604	3.58e-08	5.76e-06
101929504	84251	0.495753	3.65e-08	5.87e-06
100131208	22911	-0.495598	3.7e-08	5.93e-06
84793	11270	0.495554	3.71e-08	5.94e-06
105221694	5588	0.495559	3.71e-08	5.94e-06
284029	9750	0.495505	3.72e-08	5.96e-06
284029	51225	0.49545	3.74e-08	5.98e-06
284029	25816	0.495429	3.74e-08	5.99e-06
100131208	5978	0.495301	3.78e-08	6.03e-06
101929504	5789	0.495056	3.84e-08	6.13e-06
101929504	131578	0.494656	3.96e-08	6.29e-06
284029	23582	0.494614	3.97e-08	6.3e-06
105221694	4332	0.494376	4.04e-08	6.4e-06
100131208	922	0.494145	4.11e-08	6.5e-06
105221694	10148	0.493976	4.16e-08	6.57e-06
100131208	129807	0.4939	4.18e-08	6.6e-06
100131208	90507	0.49389	4.18e-08	6.6e-06
105221694	10578	0.493872	4.19e-08	6.6e-06
284029	8477	0.493621	4.27e-08	6.71e-06
101929504	5118	0.493599	4.27e-08	6.72e-06
221883	5794	0.493525	4.3e-08	6.74e-06
100131208	1990	0.492906	4.49e-08	7.03e-06
100131208	6646	-0.492795	4.53e-08	7.08e-06
105221694	57559	0.492	4.8e-08	7.46e-06
100131208	2128	0.491866	4.84e-08	7.53e-06
105221694	57168	0.491823	4.86e-08	7.54e-06
284029	2829	0.491369	5.02e-08	7.78e-06
101929504	633	0.491254	5.06e-08	7.84e-06
101929504	83872	0.491238	5.07e-08	7.84e-06
105221694	1043	0.490847	5.21e-08	8.04e-06
100131208	554235	0.490686	5.27e-08	8.11e-06
84793	6941	0.49062	5.29e-08	8.13e-06
221883	6690	0.490495	5.34e-08	8.19e-06
100131208	3784	0.490313	5.41e-08	8.29e-06
284029	56253	0.490298	5.42e-08	8.3e-06
101929504	4130	0.490225	5.45e-08	8.33e-06
84793	5925	-0.490131	5.48e-08	8.38e-06
105221694	3105	0.490129	5.48e-08	8.38e-06
100131208	79699	-0.489983	5.54e-08	8.46e-06
284029	115352	0.489842	5.6e-08	8.53e-06
284029	4542	0.489831	5.6e-08	8.53e-06
100131208	1417	0.488994	5.95e-08	9.03e-06
284029	3662	0.488855	6.01e-08	9.11e-06
284029	3587	0.488777	6.04e-08	9.16e-06
105221694	6355	0.488585	6.12e-08	9.27e-06
105221694	9047	0.488434	6.19e-08	9.36e-06
105221694	9111	0.488073	6.35e-08	9.58e-06
100131208	440503	0.487934	6.41e-08	9.66e-06
105221694	3059	0.487917	6.42e-08	9.67e-06
284029	55840	0.487894	6.43e-08	9.67e-06
284029	168537	0.487821	6.47e-08	9.71e-06
100131208	23394	-0.487746	6.5e-08	9.75e-06
284029	50618	0.487669	6.54e-08	9.8e-06
284029	440193	0.487554	6.59e-08	9.88e-06
284029	64805	0.48754	6.6e-08	9.88e-06
29034	1080	0.487207	6.75e-08	1.01e-05
105221694	3932	0.487071	6.82e-08	1.02e-05
105221694	4050	0.486991	6.86e-08	1.02e-05
100131208	421	0.486763	6.97e-08	1.04e-05
105221694	1230	0.486772	6.97e-08	1.04e-05
284029	5778	0.486751	6.98e-08	1.04e-05
100131208	9655	-0.486569	7.07e-08	1.05e-05
100131208	4478	-0.486409	7.15e-08	1.06e-05
100131208	1392	0.486275	7.21e-08	1.07e-05
284029	10235	0.486252	7.23e-08	1.07e-05
105221694	51237	0.485795	7.46e-08	1.1e-05
105221694	26034	0.485305	7.73e-08	1.14e-05
105221694	55619	0.485133	7.82e-08	1.15e-05
105221694	969	0.485077	7.85e-08	1.15e-05
284029	23046	0.485025	7.88e-08	1.16e-05
105221694	7409	0.484989	7.9e-08	1.16e-05
84793	22862	-0.484805	8e-08	1.17e-05
100131208	79798	0.484402	8.23e-08	1.2e-05
105221694	374403	0.484252	8.32e-08	1.22e-05
105221694	3458	0.484226	8.34e-08	1.22e-05
284029	91689	0.484155	8.38e-08	1.22e-05
101929504	23194	0.484102	8.41e-08	1.23e-05
105221694	9595	0.483996	8.47e-08	1.24e-05
105221694	118932	0.483933	8.51e-08	1.24e-05
101929504	392	0.483626	8.69e-08	1.27e-05
29034	3170	0.483583	8.72e-08	1.27e-05
29034	284422	0.483579	8.72e-08	1.27e-05
100131208	6512	0.483577	8.72e-08	1.27e-05
105221694	54900	0.483516	8.76e-08	1.27e-05
105221694	10666	0.483485	8.78e-08	1.27e-05
105221694	608	0.483444	8.81e-08	1.28e-05
221883	53841	0.48343	8.81e-08	1.28e-05
284029	4261	0.483279	8.91e-08	1.29e-05
100131208	23415	0.483281	8.91e-08	1.29e-05
105221694	7133	0.483293	8.9e-08	1.29e-05
105221694	53347	0.483236	8.93e-08	1.29e-05
100131208	29775	0.483198	8.96e-08	1.29e-05
101929504	140766	0.483147	8.99e-08	1.29e-05
100131208	57644	0.482973	9.1e-08	1.31e-05
100131208	57716	0.482528	9.39e-08	1.35e-05
101929504	5924	0.482301	9.54e-08	1.37e-05
284029	120425	0.482026	9.72e-08	1.39e-05
29034	140453	0.481518	1.01e-07	1.44e-05
105221694	51056	0.481477	1.01e-07	1.44e-05
284029	9815	0.481453	1.01e-07	1.44e-05
84793	84904	0.481422	1.01e-07	1.44e-05
284029	115350	0.481381	1.02e-07	1.44e-05
284029	3683	0.481301	1.02e-07	1.45e-05
105221694	7412	0.481176	1.03e-07	1.46e-05
100131208	145497	0.481158	1.03e-07	1.46e-05
105221694	6850	0.480821	1.06e-07	1.49e-05
284029	6503	0.480679	1.07e-07	1.5e-05
284029	863	0.480483	1.08e-07	1.52e-05
284029	29802	0.480306	1.1e-07	1.54e-05
100131208	10728	-0.479696	1.14e-07	1.6e-05
105221694	11119	0.479666	1.15e-07	1.6e-05
284029	653361	0.479568	1.15e-07	1.61e-05
105221694	93349	0.479515	1.16e-07	1.62e-05
105221694	8477	0.479493	1.16e-07	1.62e-05
105221694	7535	0.479145	1.19e-07	1.65e-05
105221694	7453	0.479128	1.19e-07	1.65e-05
100131208	90668	0.47868	1.23e-07	1.7e-05
101929340	10753	0.478585	1.23e-07	1.71e-05
101929504	7041	0.478563	1.24e-07	1.71e-05
105221694	9750	0.478161	1.27e-07	1.75e-05
100131208	7528	-0.47777	1.31e-07	1.8e-05
284029	834	0.477695	1.31e-07	1.81e-05
284029	283897	0.477677	1.31e-07	1.81e-05
100131208	79872	-0.477596	1.32e-07	1.82e-05
100131208	23471	-0.477564	1.32e-07	1.82e-05
84793	6866	0.477538	1.33e-07	1.82e-05
105221694	23564	-0.477511	1.33e-07	1.82e-05
100131208	3190	-0.477434	1.34e-07	1.83e-05
84793	4595	0.477072	1.37e-07	1.87e-05
284029	84941	0.477031	1.37e-07	1.88e-05
284029	80169	0.476969	1.38e-07	1.88e-05
221883	10917	0.47688	1.39e-07	1.89e-05
100131208	3920	-0.476347	1.44e-07	1.96e-05
100131208	208	0.476128	1.46e-07	1.99e-05
284029	971	0.476097	1.46e-07	1.99e-05
105221694	11006	0.476087	1.47e-07	1.99e-05
105221694	84433	0.476	1.47e-07	2e-05
29034	312	0.475802	1.49e-07	2.02e-05
100131208	26585	-0.475737	1.5e-07	2.03e-05
105221694	147138	0.475418	1.53e-07	2.07e-05
101929504	4675	0.475321	1.54e-07	2.08e-05
284029	55196	0.47522	1.55e-07	2.09e-05
284029	26034	0.474937	1.59e-07	2.13e-05
100131208	55721	0.474921	1.59e-07	2.13e-05
100131208	29978	-0.474831	1.6e-07	2.14e-05
100131208	50999	-0.474791	1.6e-07	2.15e-05
284029	1193	0.474556	1.63e-07	2.17e-05
105221694	9051	0.474557	1.63e-07	2.17e-05
284029	126308	0.474452	1.64e-07	2.19e-05
284029	3702	0.474331	1.65e-07	2.2e-05
100131208	8822	0.474276	1.66e-07	2.21e-05
284029	114769	0.474243	1.66e-07	2.22e-05
221883	79908	0.474106	1.68e-07	2.23e-05
105221694	54458	0.474069	1.68e-07	2.24e-05
100131208	2695	0.473857	1.71e-07	2.27e-05
284029	4033	0.473778	1.72e-07	2.28e-05
101929504	6423	0.473766	1.72e-07	2.28e-05
105221694	8875	0.473661	1.73e-07	2.29e-05
105221694	3662	0.473573	1.74e-07	2.3e-05
100131208	7163	-0.473408	1.76e-07	2.33e-05
100131208	55752	-0.473324	1.77e-07	2.34e-05
101929340	79574	0.473307	1.77e-07	2.34e-05
105221694	3660	0.473155	1.79e-07	2.36e-05
101929504	9509	0.473146	1.79e-07	2.36e-05
105221694	51816	0.472991	1.81e-07	2.38e-05
105221694	55196	0.472993	1.81e-07	2.38e-05
105221694	8809	0.472965	1.81e-07	2.38e-05
100131208	85379	0.472827	1.83e-07	2.4e-05
284029	2811	0.47265	1.85e-07	2.43e-05
105221694	924	0.472442	1.88e-07	2.46e-05
100131208	79929	0.472376	1.89e-07	2.47e-05
105221694	57823	0.472343	1.89e-07	2.47e-05
100131067	5884	0.472312	1.89e-07	2.48e-05
100131208	813	-0.472136	1.92e-07	2.5e-05
29034	3026	0.472036	1.93e-07	2.51e-05
101929340	79908	0.471557	1.99e-07	2.59e-05
105221694	84875	0.47144	2.01e-07	2.61e-05
105221694	79413	0.47134	2.02e-07	2.62e-05
101929504	123920	0.471229	2.04e-07	2.64e-05
100131208	81693	0.471081	2.06e-07	2.66e-05
105221694	917	0.471049	2.06e-07	2.67e-05
284029	83416	0.471036	2.07e-07	2.67e-05
105221694	2999	0.470997	2.07e-07	2.67e-05
100131208	1859	-0.470811	2.1e-07	2.7e-05
100131208	168455	-0.470692	2.11e-07	2.72e-05
105221694	64135	0.470672	2.12e-07	2.72e-05
100131208	7534	-0.470641	2.12e-07	2.73e-05
221883	182	0.470431	2.15e-07	2.76e-05
100131208	729956	0.470393	2.16e-07	2.77e-05
221883	11033	0.470371	2.16e-07	2.77e-05
284029	1071	0.470297	2.17e-07	2.78e-05
100131208	251	0.470274	2.17e-07	2.78e-05
284029	10287	0.470136	2.19e-07	2.8e-05
105221694	951	0.469934	2.22e-07	2.84e-05
284029	375298	0.469755	2.25e-07	2.87e-05
100131208	6645	0.469714	2.26e-07	2.88e-05
100131208	5621	-0.469371	2.31e-07	2.94e-05
284029	5880	0.469282	2.32e-07	2.96e-05
105221694	5551	0.469219	2.33e-07	2.97e-05
101929504	23090	0.469195	2.34e-07	2.97e-05
29034	119467	0.469056	2.36e-07	2.99e-05
105221694	963	0.468657	2.42e-07	3.07e-05
100131208	8557	0.468544	2.44e-07	3.09e-05
101929504	338773	0.468361	2.47e-07	3.12e-05
105221694	9214	0.468061	2.52e-07	3.18e-05
284029	23228	0.467816	2.56e-07	3.23e-05
221883	346606	0.467725	2.58e-07	3.24e-05
284029	7409	0.467705	2.58e-07	3.25e-05
284029	3635	0.467578	2.6e-07	3.27e-05
100131208	9375	-0.467493	2.62e-07	3.29e-05
100131208	10657	-0.46745	2.63e-07	3.29e-05
284029	6402	0.467426	2.63e-07	3.3e-05
84793	4241	0.467204	2.67e-07	3.34e-05
101929504	120114	0.466609	2.78e-07	3.46e-05
105221694	81622	0.466543	2.79e-07	3.47e-05
100131208	285498	0.466524	2.79e-07	3.47e-05
105221694	51513	0.466456	2.8e-07	3.49e-05
100131208	84919	-0.466307	2.83e-07	3.52e-05
100131067	91754	0.466247	2.84e-07	3.53e-05
284029	313	0.466167	2.86e-07	3.54e-05
101929504	1296	0.466165	2.86e-07	3.54e-05
101929340	23584	0.466151	2.86e-07	3.55e-05
100131208	10933	-0.465974	2.9e-07	3.58e-05
100131208	55194	0.46592	2.91e-07	3.6e-05
284029	4050	0.465878	2.91e-07	3.6e-05
100131208	387718	0.46588	2.91e-07	3.6e-05
105221694	3604	0.46582	2.93e-07	3.61e-05
105221694	286336	0.465825	2.92e-07	3.61e-05
100131208	10002	0.465742	2.94e-07	3.62e-05
100131208	3603	0.465707	2.95e-07	3.63e-05
100131208	10580	0.465577	2.97e-07	3.66e-05
105221694	356	0.465541	2.98e-07	3.66e-05
101929504	7058	0.465359	3.02e-07	3.7e-05
100131208	127	0.465163	3.06e-07	3.74e-05
101929504	5159	0.465099	3.07e-07	3.76e-05
101929340	3171	0.465069	3.07e-07	3.76e-05
100131208	9972	-0.465007	3.09e-07	3.77e-05
100131208	6782	-0.464596	3.17e-07	3.87e-05
100131208	58157	0.464502	3.19e-07	3.89e-05
101929504	11031	0.464025	3.29e-07	4e-05
100131208	10421	0.463948	3.31e-07	4.02e-05
100131208	203547	-0.463636	3.38e-07	4.1e-05
105221694	7940	0.463599	3.39e-07	4.1e-05
284029	79630	0.463547	3.4e-07	4.11e-05
284029	84969	0.463379	3.44e-07	4.15e-05
100131208	4584	0.46333	3.45e-07	4.16e-05
221883	119467	0.463282	3.46e-07	4.17e-05
105221694	219972	0.462995	3.52e-07	4.24e-05
84793	64858	0.462691	3.6e-07	4.31e-05
105221694	51284	0.462643	3.61e-07	4.32e-05
105221694	23231	0.462536	3.63e-07	4.35e-05
105221694	257106	0.46249	3.64e-07	4.36e-05
100131208	567	-0.462353	3.68e-07	4.39e-05
284029	57168	0.462342	3.68e-07	4.39e-05
101929504	1513	0.462326	3.68e-07	4.39e-05
100131208	23780	0.462317	3.69e-07	4.39e-05
105221694	3109	0.462237	3.7e-07	4.42e-05
100131208	5359	-0.462225	3.71e-07	4.42e-05
105221694	9263	0.462017	3.76e-07	4.47e-05
105221694	64926	0.462016	3.76e-07	4.47e-05
101929504	57616	0.46179	3.81e-07	4.52e-05
101929504	2295	0.461716	3.83e-07	4.54e-05
101929504	147906	0.461521	3.88e-07	4.59e-05
100131208	6813	0.46124	3.95e-07	4.66e-05
101929504	1842	0.461234	3.96e-07	4.66e-05
284029	199	0.461197	3.97e-07	4.67e-05
100131208	2794	0.46116	3.97e-07	4.68e-05
100131208	378	-0.46086	4.05e-07	4.76e-05
101929504	30008	0.460593	4.12e-07	4.84e-05
100131208	27020	-0.460459	4.16e-07	4.88e-05
100131208	121391	0.460273	4.21e-07	4.93e-05
100131067	2241	0.460083	4.26e-07	4.99e-05
284029	64092	0.459633	4.39e-07	5.13e-05
100131208	6853	0.459638	4.39e-07	5.13e-05
284029	30009	0.459591	4.4e-07	5.13e-05
100131208	283385	0.459388	4.46e-07	5.19e-05
84793	144455	0.459245	4.5e-07	5.24e-05
101929504	2259	0.459242	4.5e-07	5.24e-05
100131208	57455	0.459196	4.52e-07	5.25e-05
284029	26112	0.459053	4.56e-07	5.29e-05
105221694	158830	0.459055	4.56e-07	5.29e-05
284029	1234	0.458964	4.58e-07	5.31e-05
284029	64005	0.458894	4.61e-07	5.33e-05
100131208	1437	0.45879	4.64e-07	5.36e-05
105221694	973	0.458789	4.64e-07	5.36e-05
84793	51449	-0.458736	4.65e-07	5.37e-05
284029	197135	0.458644	4.68e-07	5.4e-05
100131208	10477	-0.458574	4.7e-07	5.42e-05
101929504	57124	0.458482	4.73e-07	5.44e-05
284029	4689	0.458407	4.75e-07	5.46e-05
284029	144535	0.4584	4.76e-07	5.46e-05
105221694	84541	0.458306	4.78e-07	5.49e-05
100131208	4783	-0.4582	4.82e-07	5.53e-05
100131208	83697	0.458053	4.86e-07	5.57e-05
100131067	11083	0.458004	4.88e-07	5.58e-05
100131208	127544	-0.458005	4.88e-07	5.58e-05
105221694	114836	0.457856	4.93e-07	5.63e-05
101929504	54838	0.457353	5.09e-07	5.8e-05
105221694	51762	0.457318	5.1e-07	5.81e-05
221883	6344	0.457279	5.11e-07	5.83e-05
84793	1616	0.45725	5.12e-07	5.84e-05
101929504	6474	0.457214	5.13e-07	5.85e-05
100131208	90	-0.45685	5.26e-07	5.97e-05
105221694	375298	0.456842	5.26e-07	5.97e-05
284029	959	0.456791	5.28e-07	5.99e-05
100131208	1440	0.456754	5.29e-07	6e-05
100131208	3188	-0.456634	5.33e-07	6.04e-05
284029	9447	0.456235	5.47e-07	6.18e-05
100131208	64844	0.456071	5.53e-07	6.24e-05
100131208	347688	0.456004	5.55e-07	6.26e-05
100131208	83475	0.455993	5.55e-07	6.26e-05
100131208	27179	0.455932	5.58e-07	6.28e-05
100131208	2516	0.455825	5.61e-07	6.31e-05
100131208	157769	-0.45582	5.62e-07	6.31e-05
29034	1755	0.455677	5.67e-07	6.36e-05
100131208	150372	0.455513	5.73e-07	6.42e-05
100131067	2635	-0.455502	5.73e-07	6.43e-05
100131208	10019	-0.455386	5.77e-07	6.47e-05
105221694	6503	0.455367	5.78e-07	6.48e-05
100131208	2935	-0.455175	5.85e-07	6.54e-05
105221694	5368	0.455181	5.85e-07	6.54e-05
100131208	54905	0.455129	5.87e-07	6.56e-05
100131208	25823	0.455097	5.88e-07	6.57e-05
100131067	57325	0.454954	5.94e-07	6.62e-05
100131208	23162	0.454914	5.95e-07	6.64e-05
284029	914	0.45471	6.03e-07	6.72e-05
100131208	255189	0.454683	6.04e-07	6.73e-05
284029	55619	0.45466	6.05e-07	6.73e-05
101929504	11174	0.454596	6.07e-07	6.75e-05
105221694	23157	0.454575	6.08e-07	6.76e-05
101929504	4313	0.454486	6.12e-07	6.79e-05
84793	83463	0.454333	6.18e-07	6.85e-05
100131208	220004	0.454238	6.21e-07	6.88e-05
100131208	3839	-0.454171	6.24e-07	6.91e-05
284029	23345	0.454132	6.26e-07	6.92e-05
100131208	26231	0.453934	6.34e-07	7e-05
100131208	374569	0.453891	6.35e-07	7.02e-05
100131208	51475	0.453757	6.41e-07	7.07e-05
100131208	55064	0.453683	6.44e-07	7.1e-05
101929340	114795	0.453624	6.46e-07	7.13e-05
100131208	64121	-0.453536	6.5e-07	7.16e-05
100131208	10311	-0.453324	6.59e-07	7.25e-05
100131208	7067	0.453294	6.6e-07	7.26e-05
105221694	5359	0.453256	6.62e-07	7.28e-05
284029	1236	0.453227	6.63e-07	7.29e-05
105221694	5579	0.453158	6.66e-07	7.31e-05
100131208	55512	0.453042	6.71e-07	7.36e-05
100131208	359948	-0.453007	6.72e-07	7.37e-05
284029	3575	0.452917	6.76e-07	7.41e-05
101929504	23022	0.452922	6.76e-07	7.41e-05
284029	11151	0.452884	6.77e-07	7.41e-05
100131208	29035	-0.452766	6.83e-07	7.45e-05
84793	9445	-0.452752	6.83e-07	7.46e-05
100131208	64975	0.452643	6.88e-07	7.5e-05
284029	51365	0.452607	6.89e-07	7.52e-05
221883	126859	0.452565	6.91e-07	7.53e-05
284029	2245	-0.452485	6.95e-07	7.56e-05
84793	51016	0.452455	6.96e-07	7.58e-05
100131208	4087	-0.45238	6.99e-07	7.6e-05
100131208	84248	-0.452137	7.1e-07	7.72e-05
100131208	151649	0.451927	7.2e-07	7.81e-05
284029	8807	0.451907	7.21e-07	7.81e-05
284029	3108	0.45182	7.25e-07	7.85e-05
105221694	974	0.451763	7.27e-07	7.87e-05
101929504	84168	0.451745	7.28e-07	7.88e-05
84793	8175	0.451573	7.36e-07	7.94e-05
284029	5293	0.451569	7.36e-07	7.94e-05
105221694	84969	0.451523	7.38e-07	7.96e-05
105221694	5026	0.451506	7.39e-07	7.97e-05
101929504	23452	0.45132	7.48e-07	8.05e-05
100131208	83538	0.451303	7.49e-07	8.05e-05
221883	6476	0.451104	7.58e-07	8.14e-05
100131208	56928	0.451092	7.59e-07	8.14e-05
105221694	221472	0.451092	7.59e-07	8.14e-05
284029	1606	0.450718	7.77e-07	8.32e-05
284029	919	0.450689	7.78e-07	8.33e-05
100131067	7248	0.45058	7.84e-07	8.37e-05
100131208	8669	-0.450551	7.85e-07	8.38e-05
101929504	79652	0.450525	7.87e-07	8.39e-05
101929504	83700	0.450486	7.88e-07	8.41e-05
284029	4064	0.450414	7.92e-07	8.44e-05
105221694	10663	0.449978	8.14e-07	8.66e-05
105221694	3428	0.449873	8.2e-07	8.71e-05
101929504	401097	0.449788	8.24e-07	8.75e-05
29034	11199	0.449682	8.29e-07	8.8e-05
105221694	133418	0.449618	8.33e-07	8.83e-05
101929504	2706	0.449582	8.35e-07	8.85e-05
101929504	25817	0.449565	8.36e-07	8.85e-05
100131208	11066	0.449445	8.42e-07	8.9e-05
100131208	55311	0.449425	8.43e-07	8.91e-05
105221694	916	0.449412	8.44e-07	8.91e-05
100131208	9758	0.449376	8.46e-07	8.93e-05
221883	80117	0.449207	8.55e-07	9.01e-05
100131208	55554	0.449161	8.57e-07	9.03e-05
100131208	735	0.449132	8.59e-07	9.04e-05
105221694	103	0.449058	8.63e-07	9.08e-05
101929504	283298	0.449034	8.64e-07	9.08e-05
105221694	4261	0.449035	8.64e-07	9.08e-05
84793	26958	0.449002	8.66e-07	9.1e-05
100131208	23603	-0.448974	8.67e-07	9.11e-05
284029	1880	0.448792	8.77e-07	9.2e-05
284029	8742	0.448757	8.79e-07	9.22e-05
221883	57586	0.448572	8.89e-07	9.32e-05
284029	7525	-0.448499	8.93e-07	9.36e-05
101929504	273	0.448278	9.06e-07	9.47e-05
101929504	1281	0.448281	9.06e-07	9.47e-05
284029	84851	0.448239	9.08e-07	9.49e-05
100131208	3660	-0.44793	9.26e-07	9.67e-05
100131208	84839	0.447902	9.27e-07	9.68e-05
284029	1378	0.447863	9.3e-07	9.7e-05
221883	3960	0.447745	9.37e-07	9.77e-05
101929504	9638	0.447549	9.48e-07	9.87e-05
100131208	81034	-0.447371	9.59e-07	9.96e-05
100131208	79718	-0.447315	9.62e-07	9.99e-05
105221694	4277	0.44707	9.77e-07	0.0001013
100131208	6386	-0.446949	9.84e-07	0.000102023
100131208	1997	-0.446807	9.93e-07	0.000102893
101929504	63874	0.446711	9.99e-07	0.000103464
284029	9881	0.446696	1e-06	0.00010352
84793	51512	0.446648	1e-06	0.000103747
284029	3290	0.446531	1.01e-06	0.00010442
100131208	79139	-0.446376	1.02e-06	0.000105309
105221694	976	0.446104	1.04e-06	0.000106844
29034	9032	0.445942	1.05e-06	0.000107624
284029	54103	0.44573	1.06e-06	0.000108875
284029	23492	0.445645	1.07e-06	0.000109274
100131208	83659	0.445641	1.07e-06	0.000109274
100131208	84641	-0.445208	1.1e-06	0.000111746
100131208	6197	-0.445058	1.11e-06	0.000112698
284029	266747	0.445046	1.11e-06	0.000112737
100131208	5604	-0.445013	1.11e-06	0.000112925
100131208	10133	-0.444829	1.12e-06	0.000114127
284029	3115	0.444784	1.13e-06	0.000114403
284029	9844	0.444754	1.13e-06	0.000114568
100131208	716	-0.444736	1.13e-06	0.000114648
105221694	5031	0.444574	1.14e-06	0.000115667
105221694	26228	0.4445	1.15e-06	0.000116103
100131067	133746	0.444474	1.15e-06	0.000116248
84793	55355	0.444359	1.16e-06	0.000117028
284029	23521	0.444334	1.16e-06	0.000117163
221883	390874	0.444251	1.16e-06	0.000117675
101929504	117248	0.44422	1.17e-06	0.000117809
100131208	25932	-0.444116	1.17e-06	0.000118333
100131208	1834	0.444067	1.18e-06	0.000118548
100131208	285601	0.444074	1.18e-06	0.000118548
284029	3574	0.444009	1.18e-06	0.000118932
84793	22877	0.44388	1.19e-06	0.000119784
100131208	135644	0.443867	1.19e-06	0.00011984
105221694	2793	0.443826	1.19e-06	0.000120043
100131208	730094	-0.443708	1.2e-06	0.000120879
105221694	2634	0.443605	1.21e-06	0.000121598
105221694	92241	0.443596	1.21e-06	0.000121617
284029	3561	0.443423	1.23e-06	0.000122732
100131208	22919	-0.443386	1.23e-06	0.000122961
101929504	51661	0.443333	1.23e-06	0.000123315
100131208	79444	0.443228	1.24e-06	0.000124072
284029	23479	0.443218	1.24e-06	0.000124096
284029	9056	0.443132	1.25e-06	0.000124612
284029	50615	0.443087	1.25e-06	0.000124905
100131208	256302	0.44308	1.25e-06	0.000124913
284029	3932	0.443001	1.26e-06	0.000125404
101929340	6886	0.442917	1.26e-06	0.000125976
284029	5168	0.44287	1.27e-06	0.000126239
100131208	954	0.442773	1.28e-06	0.000126853
100131208	219771	-0.442464	1.3e-06	0.000128932
100131208	7141	0.442437	1.3e-06	0.000129098
105221694	64744	0.442374	1.31e-06	0.000129538
100131208	8468	0.442317	1.31e-06	0.000129903
100131208	65986	-0.44223	1.32e-06	0.000130551
105221694	11118	0.442223	1.32e-06	0.000130551
105221694	1075	0.442101	1.33e-06	0.000131482
100131208	3093	-0.442082	1.33e-06	0.00013159
105221694	10261	0.442012	1.34e-06	0.000131999
100131208	2332	-0.441932	1.34e-06	0.000132544
100131208	387882	-0.441926	1.34e-06	0.000132546
100131208	8608	0.441913	1.34e-06	0.000132597
284029	10507	0.441808	1.35e-06	0.000133292
100131208	26103	0.44159	1.37e-06	0.000134888
100131208	5897	0.441517	1.38e-06	0.000135388
100131208	10017	0.441506	1.38e-06	0.000135431
100131208	140893	0.441461	1.38e-06	0.00013575
105221694	63940	0.441421	1.39e-06	0.000136031
105221694	3635	0.441379	1.39e-06	0.000136281
105221694	971	0.441359	1.39e-06	0.000136342
105221694	10225	0.44136	1.39e-06	0.000136342
105221694	139716	0.441345	1.39e-06	0.000136403
100131208	51088	-0.441112	1.41e-06	0.000138201
101929504	9719	0.441104	1.41e-06	0.000138218
100131208	54778	-0.441031	1.42e-06	0.000138787
100131208	146059	0.440957	1.43e-06	0.000139284
100131208	254272	0.440964	1.42e-06	0.000139284
105221694	9535	0.440954	1.43e-06	0.000139284
100131208	5547	-0.440932	1.43e-06	0.000139416
101929504	6935	0.440905	1.43e-06	0.000139539
100131208	26257	0.440878	1.43e-06	0.00013966
105221694	1521	0.440882	1.43e-06	0.00013966
221883	6343	0.440733	1.45e-06	0.000140669
101929504	1291	0.440591	1.46e-06	0.000141758
100131208	3312	-0.440444	1.47e-06	0.000142871
100131208	55041	-0.440331	1.48e-06	0.000143752
100131208	338692	0.440288	1.48e-06	0.000144022
100131208	84912	-0.440205	1.49e-06	0.000144533
105221694	5777	0.440183	1.49e-06	0.000144621
101929504	8076	0.440145	1.5e-06	0.000144848
105221694	53829	0.439996	1.51e-06	0.00014589
100131208	131965	0.439938	1.52e-06	0.000146354
100131208	51207	0.439926	1.52e-06	0.000146401
284029	89790	0.439881	1.52e-06	0.000146695
105221694	51225	0.439864	1.52e-06	0.000146795
105221694	130589	0.439856	1.52e-06	0.000146809
101929504	388135	0.439617	1.55e-06	0.000148794
100131208	5782	-0.439439	1.56e-06	0.000150247
105221694	921	0.439425	1.57e-06	0.000150321
84793	4288	0.439372	1.57e-06	0.000150638
105221694	1520	0.439273	1.58e-06	0.000151486
284029	389289	0.438923	1.61e-06	0.00015427
100131208	6938	-0.438922	1.61e-06	0.00015427
100131208	59342	-0.438876	1.62e-06	0.000154615
101929504	7084	0.438855	1.62e-06	0.000154752
101929504	1292	0.438796	1.63e-06	0.000155194
100131208	26060	-0.438759	1.63e-06	0.000155482
100131208	64395	-0.438698	1.64e-06	0.000155882
29034	140711	0.438611	1.64e-06	0.00015659
100131067	51306	0.438487	1.66e-06	0.000157714
29034	8431	0.438478	1.66e-06	0.000157745
100131208	7412	-0.438358	1.67e-06	0.000158785
105221694	6776	0.438282	1.68e-06	0.000159338
284029	55824	0.438254	1.68e-06	0.000159466
284029	942	0.438158	1.69e-06	0.000160304
84793	4901	0.438144	1.69e-06	0.000160375
100131208	126370	0.438133	1.69e-06	0.000160429
100131208	285973	0.438123	1.69e-06	0.000160468
100131208	51324	-0.438108	1.7e-06	0.000160547
284029	259197	0.438033	1.7e-06	0.000160985
100131208	200312	0.437914	1.72e-06	0.000161967
105221694	399	0.437885	1.72e-06	0.000162194
100131208	6247	0.437838	1.72e-06	0.000162537
101929504	6444	0.437832	1.72e-06	0.000162538
100131067	51665	0.437807	1.73e-06	0.00016266
29034	6927	0.437684	1.74e-06	0.000163637
221883	27290	0.437647	1.74e-06	0.000163947
105221694	282616	0.437562	1.75e-06	0.000164731
100131208	130120	0.437534	1.76e-06	0.000164906
284029	8850	0.437394	1.77e-06	0.000166163
101929504	4322	0.437295	1.78e-06	0.00016698
105221694	5873	0.437298	1.78e-06	0.00016698
100131208	151195	-0.437258	1.79e-06	0.000167289
105221694	4063	0.437149	1.8e-06	0.000168089
105221694	81552	0.437132	1.8e-06	0.000168202
100131208	54413	0.437045	1.81e-06	0.000168908
101929504	23414	0.437045	1.81e-06	0.000168908
284029	2313	0.437006	1.81e-06	0.000169178
100131208	9871	-0.436965	1.82e-06	0.000169532
100131208	54549	0.436843	1.83e-06	0.00017066
100131208	80737	0.436846	1.83e-06	0.00017066
100131067	27152	0.436775	1.84e-06	0.000171216
100131208	100131017	0.436761	1.84e-06	0.000171263
100131208	8467	-0.436723	1.84e-06	0.000171593
101929340	83895	0.436699	1.85e-06	0.000171715
100131208	20	0.436623	1.86e-06	0.00017244
100131208	1654	-0.436556	1.86e-06	0.000172952
105221694	11151	0.43653	1.87e-06	0.000173103
101929504	387758	0.436481	1.87e-06	0.000173547
101929504	5350	0.436432	1.88e-06	0.00017394
105221694	4049	0.436391	1.88e-06	0.000174239
284029	3512	0.436377	1.88e-06	0.000174258
100131208	3166	0.436379	1.88e-06	0.000174258
105221694	80709	0.436365	1.88e-06	0.00017432
84793	23179	-0.436285	1.89e-06	0.000175039
100131208	50614	0.436262	1.9e-06	0.000175163
100131208	92305	0.436246	1.9e-06	0.000175264
101929504	558	0.436038	1.92e-06	0.000177341
100131208	6670	-0.435944	1.93e-06	0.000178217
284029	81615	0.435859	1.94e-06	0.000178943
100131208	50943	0.435864	1.94e-06	0.000178943
284029	10875	0.435761	1.95e-06	0.000179868
100131208	8174	0.435754	1.95e-06	0.000179883
100131208	23011	-0.43573	1.96e-06	0.000180078
100131208	5912	-0.435609	1.97e-06	0.000181201
221883	55343	0.435566	1.98e-06	0.00018154
100131208	8288	0.435464	1.99e-06	0.000182523
100131208	93380	-0.435427	1.99e-06	0.000182861
100131208	5763	0.435347	2e-06	0.00018368
100131208	112939	0.435178	2.02e-06	0.000185427
29034	6374	0.435153	2.03e-06	0.000185634
100131208	54741	-0.435134	2.03e-06	0.000185778
105221694	4647	0.435096	2.03e-06	0.000186131
105221694	51393	0.435026	2.04e-06	0.000186658
100131208	30813	0.435008	2.04e-06	0.000186793
84793	115207	-0.434927	2.05e-06	0.000187493
100131208	29944	0.434893	2.06e-06	0.000187744
101929504	6382	0.434877	2.06e-06	0.000187862
100131208	55501	0.434783	2.07e-06	0.000188724
105221694	4542	0.43479	2.07e-06	0.000188724
105221694	51291	0.434777	2.07e-06	0.000188724
100131208	80776	0.434737	2.08e-06	0.000189111
100131208	11014	-0.434604	2.09e-06	0.000190422
100131208	55367	0.43457	2.1e-06	0.00019067
100131208	5626	0.434449	2.11e-06	0.000191992
29034	84699	0.434359	2.13e-06	0.00019296
100131067	57763	0.434289	2.13e-06	0.000193707
100131208	4917	0.434174	2.15e-06	0.000194765
101929504	5745	0.434002	2.17e-06	0.00019657
105221694	79626	0.433931	2.18e-06	0.000197266
105221694	3574	0.433594	2.23e-06	0.000200571
100131208	8632	0.433574	2.23e-06	0.000200738
100131208	9689	-0.433527	2.23e-06	0.000201229
105221694	3071	0.433472	2.24e-06	0.000201752
284029	54874	-0.433461	2.24e-06	0.000201813
105221694	9046	0.433184	2.28e-06	0.000204752
284029	3669	0.433099	2.29e-06	0.000205717
100131208	25876	0.43307	2.3e-06	0.000206001
100131067	10129	0.433022	2.3e-06	0.000206525
100131208	2147	0.432932	2.32e-06	0.000207491
100131208	54918	-0.432886	2.32e-06	0.000207918
101929504	1303	0.432866	2.32e-06	0.000208089
105221694	91523	0.432568	2.37e-06	0.000211526
100131208	5582	0.432495	2.38e-06	0.000212368
100131208	8445	-0.432437	2.38e-06	0.000212925
84793	221710	0.432263	2.41e-06	0.000214796
221883	2352	0.432203	2.42e-06	0.000215494
284029	920	0.432196	2.42e-06	0.000215502
100131208	8661	-0.432171	2.42e-06	0.000215747
100131208	146849	0.432087	2.43e-06	0.0002166
100131208	3073	0.432042	2.44e-06	0.000217112
100131208	66002	0.431885	2.46e-06	0.000218839
100131208	81631	-0.431828	2.47e-06	0.000219353
284029	1233	0.431813	2.47e-06	0.000219476
100131067	10902	0.431686	2.49e-06	0.000221066
284029	124989	0.43156	2.51e-06	0.00022241
101929504	51554	0.431547	2.51e-06	0.00022251
105221694	64581	0.431364	2.54e-06	0.000224786
105221694	80008	0.431262	2.56e-06	0.000225798
105221694	387357	0.431255	2.56e-06	0.000225798
284029	170575	0.431197	2.57e-06	0.000226391
284029	8514	0.431133	2.58e-06	0.000227179
221883	3026	0.431016	2.59e-06	0.000228676
100131208	92912	-0.43095	2.6e-06	0.000229501
100131208	115908	-0.430942	2.61e-06	0.000229525
100131208	1146	0.430818	2.63e-06	0.000230905
84793	9867	-0.430798	2.63e-06	0.000231091
100131208	3268	0.430777	2.63e-06	0.000231224
100131208	8924	0.430782	2.63e-06	0.000231224
100131208	91775	0.43066	2.65e-06	0.000232515
100131208	5079	0.430654	2.65e-06	0.000232516
284029	5450	0.430618	2.66e-06	0.000232888
101929504	727936	0.43054	2.67e-06	0.00023385
100131208	3567	0.430395	2.69e-06	0.000235513
105221694	57552	0.430391	2.69e-06	0.000235513
105221694	6356	0.430375	2.69e-06	0.000235653
100131208	647219	0.430335	2.7e-06	0.00023614
105221694	56833	0.430306	2.71e-06	0.000236377
105221694	1237	0.430191	2.72e-06	0.000237903
284029	55332	0.430077	2.74e-06	0.000239269
284029	51131	0.430025	2.75e-06	0.000239925
101929504	147920	0.430016	2.75e-06	0.000239973
100131208	8817	0.430009	2.75e-06	0.000239988
100131208	400954	0.429986	2.76e-06	0.000240238
284029	5351	-0.429964	2.76e-06	0.000240462
84793	11147	0.429696	2.81e-06	0.000244055
101929504	84525	0.429429	2.85e-06	0.000247756
284029	916	0.429393	2.86e-06	0.000248207
100131208	128497	0.429351	2.86e-06	0.000248727
284029	9709	0.429289	2.87e-06	0.000249395
100131208	7884	-0.42926	2.88e-06	0.00024948
101929504	26010	0.429274	2.88e-06	0.00024948
100131208	102	-0.429124	2.9e-06	0.000251402
100131208	51032	0.428944	2.93e-06	0.00025365
105221694	2185	0.428948	2.93e-06	0.00025365
101929340	474354	0.428809	2.96e-06	0.000255243
101929504	166336	0.428677	2.98e-06	0.000256888
105221694	196383	0.42868	2.98e-06	0.000256888
100131208	10179	-0.428652	2.98e-06	0.000257172
105221694	3383	0.428619	2.99e-06	0.000257587
101929504	219654	0.428579	3e-06	0.000257945
100131208	147183	0.428533	3e-06	0.000258462
84793	1813	0.428459	3.02e-06	0.000259319
100131208	1046	0.428448	3.02e-06	0.0002594
100131208	152065	0.428431	3.02e-06	0.000259408
105221694	5293	0.428417	3.03e-06	0.000259534
100131208	2697	-0.428349	3.04e-06	0.000260218
100131208	55316	0.428268	3.05e-06	0.000261192
100131208	7071	-0.428222	3.06e-06	0.000261804
100131208	7462	0.428167	3.07e-06	0.000262491
100131208	152	0.428062	3.09e-06	0.000263846
101929504	2307	0.428045	3.09e-06	0.000264031
101929340	23446	0.427974	3.1e-06	0.000264946
100131208	6553	0.427872	3.12e-06	0.000266277
100131208	2665	-0.427716	3.15e-06	0.000268469
100131208	140731	0.427715	3.15e-06	0.000268469
100131208	7319	-0.427579	3.18e-06	0.000270356
101929504	641	-0.4275	3.19e-06	0.000271514
101929340	112817	0.427442	3.2e-06	0.000272346
100131208	8938	0.427345	3.22e-06	0.000273715
105221694	7456	0.427318	3.23e-06	0.000274067
100131208	85289	0.427246	3.24e-06	0.000275126
100131208	114908	-0.427178	3.25e-06	0.000276038
84793	51601	-0.427088	3.27e-06	0.000277226
221883	1800	0.427093	3.27e-06	0.000277226
84793	5412	-0.427021	3.28e-06	0.000278134
284029	474344	0.426978	3.29e-06	0.000278696
84793	147841	0.426892	3.31e-06	0.000279954
100131208	55814	0.426798	3.33e-06	0.000281311
101929504	25878	0.426788	3.33e-06	0.000281388
84793	10460	0.426745	3.34e-06	0.000282004
101929504	51474	0.426665	3.35e-06	0.000283131
100131208	7478	0.426646	3.36e-06	0.000283305
100131208	29766	-0.426644	3.36e-06	0.000283305
100131208	5526	0.426552	3.37e-06	0.000284631
100131208	23326	0.426518	3.38e-06	0.000285107
284029	3563	0.426409	3.4e-06	0.000286793
284029	30850	-0.426406	3.4e-06	0.000286793
221883	246329	0.426385	3.41e-06	0.000287053
284029	8497	-0.426198	3.45e-06	0.000289646
100131208	5396	-0.42609	3.47e-06	0.000291276
284029	10863	0.426061	3.47e-06	0.000291669
284029	51393	0.425988	3.49e-06	0.000292816
29034	126859	0.425922	3.5e-06	0.000293856
101929504	146227	0.425897	3.51e-06	0.000294187
284029	5588	0.425887	3.51e-06	0.000294224
100131208	3785	0.425872	3.51e-06	0.000294224
84793	284403	0.425747	3.54e-06	0.00029608
84793	7517	0.425554	3.58e-06	0.000298846
100131208	359	0.425513	3.59e-06	0.000299459
105221694	8115	0.425465	3.6e-06	0.000300195
100131208	55289	0.425425	3.6e-06	0.000300723
84793	578	0.425405	3.61e-06	0.000300952
221883	3177	0.425352	3.62e-06	0.000301611
101929504	64081	0.4253	3.63e-06	0.000302205
284029	54855	0.425277	3.64e-06	0.000302416
100131208	6733	-0.425241	3.64e-06	0.000302958
284029	55016	0.425107	3.67e-06	0.000305126
29034	1510	0.42508	3.68e-06	0.000305321
100131208	4670	-0.425079	3.68e-06	0.000305321
101929504	151887	0.425058	3.68e-06	0.000305601
100131208	60484	0.424977	3.7e-06	0.00030681
101929504	10085	0.424879	3.72e-06	0.000308297
101929504	1307	0.424821	3.73e-06	0.000309137
100131208	388323	0.424569	3.79e-06	0.000313194
84793	255374	0.424552	3.79e-06	0.000313405
100131208	3840	-0.424502	3.8e-06	0.000314118
100131208	100533178	0.424499	3.8e-06	0.000314118
284029	2219	0.424488	3.81e-06	0.00031415
284029	64407	0.424473	3.81e-06	0.000314329
221883	140711	0.424429	3.82e-06	0.000314835
100131208	4248	0.424358	3.83e-06	0.000316027
100131208	3549	0.424245	3.86e-06	0.00031788
100131208	9873	-0.424241	3.86e-06	0.00031788
29034	8856	0.424145	3.88e-06	0.000319136
84793	133688	0.424096	3.89e-06	0.000319836
84793	1519	-0.424048	3.9e-06	0.00032051
100131208	253943	-0.423958	3.92e-06	0.000321998
284029	6363	0.423795	3.96e-06	0.000324671
100131208	157697	0.423787	3.96e-06	0.000324671
105221694	10475	0.423677	3.99e-06	0.000326432
84793	4053	-0.423389	4.06e-06	0.000331392
84793	2331	-0.423361	4.06e-06	0.000331824
84793	4760	0.423317	4.07e-06	0.000332566
100131208	10368	0.423215	4.1e-06	0.000334098
100131208	4985	0.423141	4.11e-06	0.000335438
284029	387357	0.423105	4.12e-06	0.000335805
100131208	147685	0.423082	4.13e-06	0.000336084
84793	1033	0.423066	4.13e-06	0.000336214
101929504	23627	0.423062	4.13e-06	0.000336214
105221694	8869	0.423043	4.14e-06	0.000336475
100131208	56244	0.423037	4.14e-06	0.000336487
101929504	579	0.422879	4.18e-06	0.000339239
84793	29980	0.422866	4.18e-06	0.0003394
105221694	51365	0.42284	4.19e-06	0.000339792
105221694	113730	0.422774	4.2e-06	0.000340922
284029	169355	0.422717	4.22e-06	0.000341782
100131208	8354	0.422667	4.23e-06	0.000342658
105221694	89790	0.422559	4.26e-06	0.000344691
100131208	9802	-0.422416	4.29e-06	0.00034711
84793	80204	0.422339	4.31e-06	0.00034838
284029	5199	0.422298	4.32e-06	0.000348938
105221694	920	0.42223	4.34e-06	0.000349758
284029	121355	0.422194	4.35e-06	0.000350146
29034	2646	0.422105	4.37e-06	0.000351757
100131208	23269	-0.422092	4.37e-06	0.000351757
100131208	128853	0.422098	4.37e-06	0.000351757
100131208	84630	0.42208	4.37e-06	0.000351893
100131208	143678	0.421981	4.4e-06	0.000353582
100131208	4615	-0.421939	4.41e-06	0.000354204
100131208	160728	0.421939	4.41e-06	0.000354204
84793	11144	0.421849	4.43e-06	0.000355832
84793	2000	0.421831	4.44e-06	0.000355969
105221694	55024	0.421775	4.45e-06	0.000356887
284029	26191	0.421758	4.46e-06	0.000357134
284029	155038	0.421702	4.47e-06	0.000357951
100131208	55237	0.421706	4.47e-06	0.000357951
100131208	8450	-0.421638	4.49e-06	0.000359047
84793	26147	0.421537	4.51e-06	0.000360679
100131208	8335	0.421451	4.54e-06	0.000362363
101929504	1893	0.421407	4.55e-06	0.00036305
100131208	113177	0.421401	4.55e-06	0.000363052
100131067	118	0.421374	4.56e-06	0.000363513
100131208	79774	0.421292	4.58e-06	0.000364774
84793	10161	-0.421208	4.6e-06	0.000365781
100131208	85403	-0.421194	4.6e-06	0.000365913
100131208	284184	0.421185	4.61e-06	0.000365997
100131208	92736	0.421171	4.61e-06	0.000366171
105221694	1493	0.421134	4.62e-06	0.000366732
221883	2531	-0.421045	4.64e-06	0.000368494
100131208	84148	0.421036	4.65e-06	0.000368561
101929504	64175	0.421008	4.65e-06	0.000369053
100131208	400629	0.420848	4.7e-06	0.000372225
100131208	51564	0.420809	4.71e-06	0.000372934
100131208	23519	0.420671	4.74e-06	0.000375429
105221694	199	0.420598	4.76e-06	0.000376896
221883	266727	0.42058	4.77e-06	0.000377168
284029	2533	0.420541	4.78e-06	0.000377893
100131208	90639	0.420469	4.8e-06	0.000379346
84793	1031	0.420294	4.85e-06	0.000382805
284029	6781	-0.420296	4.85e-06	0.000382805
101929504	1346	0.420264	4.86e-06	0.000383351
105221694	51752	0.420209	4.87e-06	0.000384427
105221694	3575	0.420194	4.88e-06	0.000384646
100131208	1738	-0.420073	4.91e-06	0.000387088
100131208	2696	0.419844	4.97e-06	0.000391462
100131208	284131	0.419659	5.03e-06	0.000395381
100131208	283600	0.419615	5.04e-06	0.000396257
101929504	1909	0.419589	5.05e-06	0.000396721
100131208	9646	-0.419553	5.06e-06	0.0003973
100131067	79048	0.419464	5.08e-06	0.00039909
84793	3786	0.41935	5.12e-06	0.000401325
221883	1080	0.419314	5.13e-06	0.00040203
84793	79019	0.419224	5.15e-06	0.000403749
101929504	57007	0.419197	5.16e-06	0.0004041
105221694	118788	0.419179	5.17e-06	0.000404393
105221694	1844	0.419142	5.18e-06	0.000405121
84793	1634	-0.419088	5.19e-06	0.000405881
284029	7535	0.419017	5.21e-06	0.000407029
100131208	4923	0.419025	5.21e-06	0.000407029
284029	945	0.418997	5.22e-06	0.000407358
105221694	55840	0.418984	5.22e-06	0.000407528
100131208	148109	0.418906	5.25e-06	0.00040897
100131208	5906	-0.418797	5.28e-06	0.000411414
105221694	2533	0.418626	5.33e-06	0.000414583
105221694	10855	0.418627	5.33e-06	0.000414583
100131208	51186	-0.418613	5.34e-06	0.000414728
100131208	27202	0.4185	5.37e-06	0.000416913
100131208	3909	0.418411	5.4e-06	0.00041864
100131208	127795	0.418419	5.4e-06	0.00041864
105221694	8514	0.418315	5.43e-06	0.000420675
100131208	8915	-0.418303	5.43e-06	0.000420843
100131067	6430	0.418235	5.45e-06	0.000422084
100131208	307	-0.418104	5.49e-06	0.000424603
29034	4640	0.418032	5.52e-06	0.000426193
100131208	182	0.418028	5.52e-06	0.000426193
84793	26150	0.41793	5.55e-06	0.000428045
100131208	10573	0.41793	5.55e-06	0.000428045
100131208	55161	-0.417861	5.57e-06	0.000429598
101929504	5176	0.417803	5.59e-06	0.000430495
105221694	10538	0.41778	5.6e-06	0.00043092
84793	219899	-0.417769	5.6e-06	0.000431059
100131208	151011	-0.417761	5.6e-06	0.000431146
105221694	84516	-0.417665	5.63e-06	0.000433355
284029	51316	0.417571	5.66e-06	0.000435288
101929504	8630	0.417377	5.72e-06	0.000439637
100131208	7093	0.417334	5.74e-06	0.000440258
100131208	84063	0.417304	5.75e-06	0.000440886
101929340	3960	0.417213	5.78e-06	0.000442773
221883	1577	0.41693	5.87e-06	0.000448835
100131208	4070	0.416881	5.89e-06	0.000449953
284029	284021	0.41682	5.91e-06	0.000451122
100131208	64106	0.416769	5.93e-06	0.000452275
105221694	752	0.416702	5.95e-06	0.000453878
101929504	2736	0.416668	5.96e-06	0.000454596
284029	2213	0.416633	5.97e-06	0.000455247
284029	89857	0.416615	5.98e-06	0.000455487
100131208	7259	-0.416613	5.98e-06	0.000455487
284029	64231	0.416529	6.01e-06	0.000457154
100131208	10845	-0.416527	6.01e-06	0.000457154
105221694	9450	0.416387	6.06e-06	0.00045997
100131208	5371	-0.416374	6.06e-06	0.000460182
100131208	132203	0.416159	6.13e-06	0.000465397
84793	80310	-0.416131	6.14e-06	0.000465994
100131208	55233	-0.41608	6.16e-06	0.000467087
100131208	57795	0.416072	6.16e-06	0.000467135
100131208	81606	-0.41606	6.17e-06	0.000467201
105221694	1438	0.415948	6.21e-06	0.000469582
221883	26093	0.415907	6.22e-06	0.000470524
100131208	79188	-0.41589	6.23e-06	0.000470695
105221694	3133	0.415865	6.24e-06	0.000471221
84793	2237	0.415817	6.25e-06	0.000472217
284029	7940	0.41577	6.27e-06	0.000473083
100131208	387763	0.415723	6.29e-06	0.00047418
100131208	10466	-0.415604	6.33e-06	0.000476682
100131208	112885	0.415585	6.34e-06	0.000476902
100131208	2044	0.415559	6.35e-06	0.000477468
284029	2999	0.415535	6.35e-06	0.000477975
100131208	81488	-0.415474	6.38e-06	0.0004792
84793	1017	0.415432	6.39e-06	0.000480055
105221694	440193	0.415398	6.4e-06	0.000480689
100131208	9726	0.415315	6.43e-06	0.000482809
84793	153339	-0.415224	6.47e-06	0.000484858
100131208	10346	-0.415225	6.47e-06	0.000484858
100131208	6953	0.415215	6.47e-06	0.000484945
105221694	10217	-0.41521	6.47e-06	0.000484945
101929504	9585	-0.415073	6.52e-06	0.000488433
105221694	282618	0.415064	6.53e-06	0.000488521
105221694	124535	0.415015	6.54e-06	0.000489743
101929504	6299	0.415008	6.55e-06	0.000489791
100131208	401097	-0.414912	6.58e-06	0.000491992
84793	27	0.414868	6.6e-06	0.000493085
100131208	129607	-0.414857	6.6e-06	0.000493253
284029	58515	0.414758	6.64e-06	0.000495569
100131067	1452	0.414725	6.65e-06	0.000496188
100131208	7755	0.414726	6.65e-06	0.000496188
100131208	390927	0.414709	6.66e-06	0.00049636
100131208	283933	0.414696	6.66e-06	0.000496567
284029	5583	0.414684	6.67e-06	0.000496767
105221694	5552	0.414622	6.69e-06	0.000498057
284029	5792	-0.414603	6.7e-06	0.000498188
100131208	51191	-0.414602	6.7e-06	0.000498188
100131208	5862	0.414495	6.74e-06	0.000500164
101929504	57333	0.414503	6.73e-06	0.000500164
105221694	64231	0.414497	6.74e-06	0.000500164
100131208	126567	0.414475	6.75e-06	0.000500596
100131208	162968	0.414456	6.75e-06	0.000500969
284029	51703	0.414401	6.77e-06	0.00050223
101929504	10272	0.414373	6.78e-06	0.000502721
29034	55282	0.414321	6.8e-06	0.000503758
105221694	837	0.414312	6.81e-06	0.000503879
105221694	10288	0.414297	6.81e-06	0.000504165
100131208	6604	0.414237	6.84e-06	0.000505424
100131208	8575	-0.414229	6.84e-06	0.00050549
221883	5452	0.4141	6.89e-06	0.000508457
100131208	90050	0.414048	6.91e-06	0.000509688
84793	53820	0.413989	6.93e-06	0.000510885
100131208	6794	0.41394	6.95e-06	0.000511854
100131208	162515	0.41392	6.96e-06	0.000512278
100131208	56139	0.413842	6.99e-06	0.000514373
284029	6494	0.413803	7e-06	0.000515191
84793	11190	0.413713	7.04e-06	0.000517652
84793	3833	0.4137	7.05e-06	0.000517907
100131208	9610	0.413683	7.05e-06	0.000518227
100131208	6439	0.41365	7.07e-06	0.000519061
284029	57823	0.413638	7.07e-06	0.000519096
100131208	7321	-0.413626	7.07e-06	0.000519311
100131208	136242	0.413582	7.09e-06	0.000520146
284029	6546	0.413559	7.1e-06	0.000520662
284029	921	0.413544	7.11e-06	0.000520934
100131208	3982	0.413469	7.14e-06	0.000522269
100131208	11338	0.413468	7.14e-06	0.000522269
105221694	57699	0.413475	7.13e-06	0.000522269
100131208	64236	0.413413	7.16e-06	0.000523271
101929504	3912	0.413419	7.16e-06	0.000523271
105221694	81793	0.413417	7.16e-06	0.000523271
105221694	27240	0.413356	7.18e-06	0.000524801
100131208	27039	0.413318	7.2e-06	0.000525636
84793	195828	0.413086	7.29e-06	0.000531142
221883	79797	0.413038	7.31e-06	0.000532249
84793	8404	-0.41297	7.34e-06	0.000533967
221883	7032	0.412785	7.42e-06	0.000538917
100131208	2169	0.412772	7.42e-06	0.000538931
100131208	4904	-0.412764	7.42e-06	0.000538931
100131208	5662	0.412771	7.42e-06	0.000538931
100131208	102800317	0.412764	7.42e-06	0.000538931
100131208	1490	-0.412748	7.43e-06	0.00053928
84793	2306	0.412668	7.46e-06	0.000541235
100131208	4853	-0.41267	7.46e-06	0.000541235
100131208	10917	0.412644	7.47e-06	0.000541794
105221694	3717	0.412622	7.48e-06	0.000542308
101929504	253827	0.412612	7.49e-06	0.000542455
105221694	60559	0.412524	7.52e-06	0.000544659
100131208	4199	-0.412374	7.59e-06	0.000548803
100131208	715	-0.412238	7.65e-06	0.000552819
101929504	5587	0.412218	7.65e-06	0.000553266
100131208	55832	-0.412181	7.67e-06	0.000554261
105221694	1193	0.41215	7.68e-06	0.000555077
100131208	7043	0.41202	7.74e-06	0.0005588
221883	1559	0.411896	7.79e-06	0.000562502
221883	29974	0.411846	7.82e-06	0.000563925
221883	3706	0.411775	7.85e-06	0.000565701
284029	51816	0.411648	7.9e-06	0.000569038
221883	1815	0.411459	7.99e-06	0.00057413
284029	91010	0.411422	8e-06	0.000574975
105221694	51018	-0.411377	8.02e-06	0.000576253
100131208	54665	-0.411344	8.04e-06	0.000577168
100131208	43849	0.411241	8.08e-06	0.000580154
284029	25900	0.411229	8.09e-06	0.000580362
105221694	29887	0.411105	8.14e-06	0.000583883
105221694	83440	0.4111	8.15e-06	0.000583883
100131208	90665	0.411084	8.15e-06	0.000584256
221883	1510	0.410998	8.19e-06	0.000586562
84793	29888	0.41096	8.21e-06	0.000587459
221883	144717	0.410962	8.21e-06	0.000587459
84793	64123	-0.41085	8.26e-06	0.000590561
84793	79846	-0.410743	8.31e-06	0.000593768
100131208	81033	0.410725	8.32e-06	0.00059404
105221694	9985	0.410725	8.32e-06	0.00059404
100131208	84890	-0.410687	8.34e-06	0.000594838
100131208	284361	0.410541	8.4e-06	0.000599185
284029	3560	0.410531	8.41e-06	0.000599234
101929340	140453	0.410507	8.42e-06	0.000599757
100131208	23025	0.410459	8.44e-06	0.000601203
101929340	2307	0.410369	8.48e-06	0.000603701
101929504	25927	0.410357	8.49e-06	0.000603936
100131208	201140	0.410335	8.5e-06	0.000604136
100131208	4440	0.410311	8.51e-06	0.000604477
284029	10663	0.410302	8.52e-06	0.000604589
105221694	168537	0.410228	8.55e-06	0.000606574
100131208	400506	0.410197	8.57e-06	0.00060713
105221694	5610	0.410199	8.57e-06	0.00060713
84793	1601	-0.410131	8.6e-06	0.000608681
284029	51601	0.41008	8.62e-06	0.000610204
100131208	2848	0.410041	8.64e-06	0.000611372
100131208	5591	-0.40991	8.7e-06	0.000615305
100131208	146	0.409868	8.72e-06	0.000616591
84793	5015	0.409841	8.74e-06	0.000617334
284029	397	0.409761	8.78e-06	0.000619741
100131208	10957	-0.409717	8.8e-06	0.000620724
29034	57476	0.409686	8.81e-06	0.000621621
84793	27127	0.409645	8.83e-06	0.00062271
105221694	257101	0.409627	8.84e-06	0.000623125
101929504	10468	0.40961	8.85e-06	0.000623382
105221694	7941	0.409573	8.87e-06	0.000624472
100131208	2738	0.409566	8.87e-06	0.000624476
84793	991	0.409495	8.91e-06	0.000626311
105221694	9437	0.409414	8.95e-06	0.000628804
84793	55107	-0.409399	8.95e-06	0.000629153
29034	56667	0.409215	9.05e-06	0.0006344
105221694	285195	0.409103	9.1e-06	0.00063796
84793	81620	0.409071	9.12e-06	0.000638916
100131208	11037	-0.408971	9.17e-06	0.000641373
284029	79668	0.408864	9.22e-06	0.000644443
100131208	7082	-0.408841	9.23e-06	0.00064496
105221694	23046	0.408648	9.33e-06	0.000651306
84793	5984	0.408628	9.34e-06	0.000651569
284029	940	0.408611	9.35e-06	0.000651886
284029	497189	0.408608	9.35e-06	0.000651886
221883	416	0.408564	9.38e-06	0.000653248
100131208	54453	-0.40856	9.38e-06	0.000653248
100131208	11215	-0.408514	9.4e-06	0.000654412
100131208	168544	0.408513	9.4e-06	0.000654412
84793	197131	-0.408476	9.42e-06	0.000655495
284029	11142	0.408473	9.42e-06	0.000655495
284029	51061	0.408405	9.46e-06	0.000657783
101929504	2009	0.408365	9.48e-06	0.000658862
100131208	64062	0.408357	9.48e-06	0.000658989
105221694	84824	0.408325	9.5e-06	0.00065981
29034	80117	0.408261	9.53e-06	0.000661767
100131208	79753	-0.40825	9.54e-06	0.000661972
100131208	6774	-0.408231	9.55e-06	0.000662317
100131208	2854	0.408216	9.56e-06	0.00066268
84793	11065	0.408144	9.6e-06	0.00066479
100131208	26083	0.408121	9.61e-06	0.000665265
105221694	2745	0.408103	9.62e-06	0.000665748
105221694	597	0.40807	9.64e-06	0.000666778
221883	6927	0.408046	9.65e-06	0.000667141
284029	752	0.408045	9.65e-06	0.000667141
101929504	3671	0.408047	9.65e-06	0.000667141
100131208	27252	-0.407961	9.69e-06	0.000668962
100131208	203076	0.407963	9.69e-06	0.000668962
100131208	1027	-0.407844	9.76e-06	0.0006724
100131208	1200	-0.407847	9.75e-06	0.0006724
105221694	57539	-0.407791	9.78e-06	0.000673621
284029	85007	0.407632	9.87e-06	0.00067881
101929504	5327	0.407613	9.88e-06	0.000679343
100131208	51715	-0.407586	9.9e-06	0.000679995
284029	835	-0.407568	9.91e-06	0.000680459
105221694	120425	0.407542	9.92e-06	0.000681271
100131208	8027	-0.407433	9.98e-06	0.000684255
284029	5023	0.407415	9.99e-06	0.000684757
105221694	91937	0.407365	1e-05	0.000686257
100131208	339366	0.407314	1e-05	0.000687815
100131208	84173	0.407266	1.01e-05	0.000689258
105221694	2766	0.407196	1.01e-05	0.000691186
100131208	51056	-0.407175	1.01e-05	0.000691782
84793	29781	0.407165	1.01e-05	0.000691892
101929504	23176	0.407163	1.01e-05	0.000691892
100131208	5290	-0.407146	1.01e-05	0.000692353
105221694	80012	0.407104	1.02e-05	0.000693758
105221694	23643	0.407094	1.02e-05	0.000693961
100131208	372	-0.407039	1.02e-05	0.000695668
284029	29851	0.407007	1.02e-05	0.000696518
100131208	3743	0.406995	1.02e-05	0.0006968
284029	22900	0.406904	1.03e-05	0.000698989
284029	23048	0.406787	1.03e-05	0.000702909
100131208	7047	0.406752	1.04e-05	0.000704078
100131208	170589	0.406746	1.04e-05	0.000704147
100131208	375759	0.406688	1.04e-05	0.000705803
100131208	55676	-0.40664	1.04e-05	0.000707111
100131208	353497	0.406641	1.04e-05	0.000707111
101929504	26011	0.406605	1.04e-05	0.00070829
105221694	7052	0.406583	1.05e-05	0.000708563
284029	51744	0.40653	1.05e-05	0.000710079
100131208	27343	0.406493	1.05e-05	0.000711307
100131208	57657	0.406438	1.05e-05	0.000713281
101929504	4811	0.406369	1.06e-05	0.000715417
100131208	196993	0.406302	1.06e-05	0.000717454
284029	114548	0.40628	1.06e-05	0.000718133
105221694	5294	0.406221	1.07e-05	0.000720095
100131208	10294	-0.406203	1.07e-05	0.000720428
105221694	29110	0.406206	1.07e-05	0.000720428
284029	9046	0.406161	1.07e-05	0.000721879
284029	8698	0.406034	1.08e-05	0.00072633
100131208	6011	0.406013	1.08e-05	0.000727
284029	54458	0.405946	1.08e-05	0.000729101
100131067	286097	0.405933	1.08e-05	0.000729424
284029	1627	-0.405822	1.09e-05	0.000733268
105221694	79156	0.405793	1.09e-05	0.000734253
101929504	5592	0.405781	1.09e-05	0.00073432
100131208	79595	-0.405769	1.09e-05	0.000734471
29034	4284	0.405713	1.1e-05	0.000736187
100131067	83989	0.405712	1.1e-05	0.000736187
100131208	8392	0.405707	1.1e-05	0.000736187
29034	4975	0.405692	1.1e-05	0.000736569
100131208	7705	-0.405564	1.11e-05	0.000741153
221883	3814	0.405509	1.11e-05	0.000742804
100131208	51729	-0.40545	1.11e-05	0.000744789
100131208	401647	0.405399	1.12e-05	0.000746419
100131208	85459	0.405365	1.12e-05	0.000747475
100131208	5663	0.405346	1.12e-05	0.000747857
100131208	8725	0.405262	1.12e-05	0.000750732
100131208	284611	-0.405266	1.12e-05	0.000750732
84793	8061	0.405247	1.12e-05	0.000750961
101929340	83998	0.40525	1.12e-05	0.000750961
84793	427	-0.405225	1.13e-05	0.000751238
101929504	4487	0.405227	1.13e-05	0.000751238
100131208	162540	0.405168	1.13e-05	0.000753008
284029	2672	0.405033	1.14e-05	0.000757805
284029	51314	0.405025	1.14e-05	0.000757898
29034	10917	0.405011	1.14e-05	0.000758302
100131067	80817	0.404979	1.14e-05	0.000759424
84793	1657	-0.404898	1.15e-05	0.000762005
101929504	23704	0.404846	1.15e-05	0.000763953
84793	4239	-0.404824	1.15e-05	0.000764693
284029	57580	0.404784	1.15e-05	0.000765962
284029	953	0.404746	1.16e-05	0.000767145
100131208	2779	0.404682	1.16e-05	0.000769217
105221694	56126	-0.404674	1.16e-05	0.000769346
84793	950	-0.404633	1.16e-05	0.000770456
100131208	100329135	0.404641	1.16e-05	0.000770456
100131208	181	0.404592	1.17e-05	0.000771898
284029	83417	0.404502	1.17e-05	0.000775406
100131208	51441	-0.404484	1.17e-05	0.000775872
105221694	57121	0.404475	1.17e-05	0.000775923
100131208	9789	-0.404333	1.18e-05	0.000781453
84793	10052	0.404295	1.18e-05	0.000782559
84793	10955	-0.404287	1.19e-05	0.000782612
101929504	25992	0.404284	1.19e-05	0.000782612
100131067	51667	-0.404203	1.19e-05	0.000785608
100131208	4808	0.404088	1.2e-05	0.000789796
105221694	27181	0.404078	1.2e-05	0.000789917
100131067	3912	0.404058	1.2e-05	0.000790473
100131208	91137	-0.404009	1.2e-05	0.000792353
101929504	5396	0.404	1.2e-05	0.000792558
284029	2350	0.40391	1.21e-05	0.000795599
284029	23335	0.403704	1.22e-05	0.000802524
100131208	9436	0.403696	1.22e-05	0.000802634
100131208	22872	-0.403685	1.22e-05	0.000802916
100131208	10285	-0.403608	1.23e-05	0.000805855
101929504	10630	0.403573	1.23e-05	0.00080703
105221694	3959	0.403572	1.23e-05	0.00080703
101929504	1809	0.403556	1.23e-05	0.00080753
101929504	27254	0.403538	1.23e-05	0.000808099
100131208	1262	0.403509	1.24e-05	0.000808765
284029	6916	0.403494	1.24e-05	0.000808808
100131208	3042	0.403353	1.25e-05	0.000813963
221883	80125	0.403183	1.26e-05	0.000819782
101929504	84624	0.402992	1.27e-05	0.000826917
284029	730	0.40298	1.27e-05	0.000827237
100131208	8321	-0.402955	1.27e-05	0.000828135
84793	55038	0.402872	1.28e-05	0.000831039
100131067	92906	-0.402853	1.28e-05	0.000831662
100131208	84792	0.402842	1.28e-05	0.000831723
105221694	272	0.402749	1.29e-05	0.000835509
100131208	10361	0.402525	1.3e-05	0.000843773
84793	83902	0.402481	1.31e-05	0.000845522
105221694	4040	-0.402334	1.32e-05	0.000851269
284029	414328	0.40226	1.32e-05	0.000854435
100131208	5066	-0.402248	1.32e-05	0.000854557
100131208	6478	-0.402242	1.32e-05	0.000854557
100131208	647087	-0.402182	1.33e-05	0.000856776
84793	7494	-0.402093	1.34e-05	0.000859803
284029	9315	-0.402022	1.34e-05	0.000862456
284029	51646	0.401975	1.34e-05	0.000864222
100131208	114787	0.401969	1.34e-05	0.000864263
221883	83697	0.401937	1.35e-05	0.000865323
101929504	26115	0.401923	1.35e-05	0.000865539
101929504	348995	-0.401833	1.35e-05	0.0008691
100131208	338811	0.40181	1.36e-05	0.000869979
100131208	57165	0.401794	1.36e-05	0.000870308
100131208	84264	0.401727	1.36e-05	0.000873247
105221694	64285	-0.401713	1.36e-05	0.000873654
100131208	60506	0.401683	1.37e-05	0.000874852
84793	7272	0.401642	1.37e-05	0.000876151
100131208	51206	0.401646	1.37e-05	0.000876151
100131208	54872	0.401539	1.38e-05	0.000880347
100131208	147807	0.401487	1.38e-05	0.000882611
284029	7422	-0.401375	1.39e-05	0.000886862
105221694	2317	-0.401375	1.39e-05	0.000886862
100131208	29940	-0.401368	1.39e-05	0.000886955
100131208	1849	-0.401356	1.39e-05	0.000887328
284029	1901	0.401241	1.4e-05	0.000891971
284029	146206	0.401214	1.4e-05	0.000892821
84793	778	0.40104	1.41e-05	0.000899847
101929340	1048	0.401023	1.41e-05	0.000900357
105221694	5305	0.400997	1.42e-05	0.000901272
105221694	51314	0.400992	1.42e-05	0.000901272
284029	837	0.400985	1.42e-05	0.00090143
101929504	3910	0.400852	1.43e-05	0.000906734
284029	10261	0.400811	1.43e-05	0.000908091
100131208	3554	-0.400814	1.43e-05	0.000908091
84793	10024	0.400694	1.44e-05	0.000912894
100131208	10491	-0.400647	1.44e-05	0.000914816
221883	89870	0.400628	1.44e-05	0.000915265
284029	6850	0.400609	1.45e-05	0.000915736
105221694	930	0.40059	1.45e-05	0.000916434
100131208	1994	-0.400569	1.45e-05	0.000917236
84793	10112	0.400489	1.46e-05	0.000920297
221883	3238	0.400493	1.46e-05	0.000920297
100131208	10146	-0.400408	1.46e-05	0.000923635
284029	22861	0.400389	1.46e-05	0.00092433
284029	7494	0.400374	1.46e-05	0.00092487
84793	768	0.400316	1.47e-05	0.000927522
100131208	164592	0.400183	1.48e-05	0.000932797
284029	55589	0.400146	1.48e-05	0.000934161
100131208	84640	-0.400118	1.49e-05	0.000935123
221883	79874	0.400084	1.49e-05	0.000936372
84793	54954	0.400033	1.49e-05	0.000938707
100131208	4947	-0.399942	1.5e-05	0.000942124
100131208	54890	-0.399943	1.5e-05	0.000942124
101929504	11346	0.399884	1.5e-05	0.000944625
100131067	1153	0.399798	1.51e-05	0.000948357
100131208	10289	-0.3998	1.51e-05	0.000948357
101929340	3026	0.399742	1.52e-05	0.000950409
84793	100130958	0.399701	1.52e-05	0.0009518
100131208	479	0.399678	1.52e-05	0.000952778
101929504	27122	0.399665	1.52e-05	0.00095317
105221694	8564	0.3996	1.53e-05	0.000956267
284029	27033	0.399593	1.53e-05	0.000956382
100131208	124912	0.399583	1.53e-05	0.000956495
100131208	344787	0.399543	1.53e-05	0.000958261
101929504	30851	0.399436	1.54e-05	0.000963335
84793	127002	0.399423	1.54e-05	0.000963729
100131208	4544	0.399384	1.54e-05	0.000965264
100131208	64599	0.399386	1.54e-05	0.000965264
100131208	51573	-0.399281	1.55e-05	0.000970144
284029	5294	0.399225	1.56e-05	0.00097214
84793	1297	0.399205	1.56e-05	0.000972431
100131208	23473	-0.399208	1.56e-05	0.000972431
101929504	143903	0.399135	1.57e-05	0.000975641
221883	283152	0.399096	1.57e-05	0.000977184
29034	11181	0.399063	1.57e-05	0.000978406
105221694	128611	0.399064	1.57e-05	0.000978406
284029	10538	0.399021	1.58e-05	0.000980406
100131208	6620	0.398979	1.58e-05	0.000982103
284029	60489	0.398969	1.58e-05	0.000982144
100131208	49854	-0.39894	1.58e-05	0.000983441
101929504	255783	0.398752	1.6e-05	0.000992446
100131208	24139	0.39873	1.6e-05	0.000993334
100131208	23528	-0.39855	1.62e-05	0.0010015
100131208	56105	0.398518	1.62e-05	0.00100271
101929504	9315	0.398429	1.63e-05	0.00100703
221883	9514	0.398356	1.63e-05	0.00101019
221883	4593	0.398329	1.63e-05	0.00101144
84793	1805	-0.398305	1.64e-05	0.00101224
284029	56605	0.398291	1.64e-05	0.00101276
284029	255231	0.398282	1.64e-05	0.00101297
284029	23550	0.398167	1.65e-05	0.0010184
100131208	80218	-0.398103	1.65e-05	0.00102099
100131208	2730	-0.398042	1.66e-05	0.0010238
84793	1102	-0.397948	1.67e-05	0.0010277
284029	6166	0.397892	1.67e-05	0.00103015
84793	116115	0.397858	1.68e-05	0.00103144
100131067	165904	-0.397666	1.69e-05	0.00104054
284029	152926	0.397622	1.7e-05	0.00104269
84793	1857	0.397568	1.7e-05	0.00104547
100131208	8030	-0.397532	1.71e-05	0.00104696
284029	139818	0.397512	1.71e-05	0.00104785
100131208	3688	-0.397505	1.71e-05	0.00104795
100131208	9929	-0.397499	1.71e-05	0.00104804
84793	8987	0.39747	1.71e-05	0.00104843
84793	93273	0.397482	1.71e-05	0.00104843
100131208	810	0.397475	1.71e-05	0.00104843
100131208	26093	0.397485	1.71e-05	0.00104843
84793	2034	-0.397435	1.71e-05	0.00105009
105221694	2672	0.39738	1.72e-05	0.00105281
100131208	148014	0.397343	1.72e-05	0.00105423
100131208	57794	0.397315	1.73e-05	0.00105558
101929504	23213	0.397299	1.73e-05	0.00105598
101929504	23512	-0.397259	1.73e-05	0.00105794
84793	2314	-0.397226	1.73e-05	0.00105931
105221694	79930	0.397191	1.74e-05	0.00106104
84793	9935	-0.397167	1.74e-05	0.00106189
284029	9452	0.39715	1.74e-05	0.00106236
284029	10827	0.397066	1.75e-05	0.00106533
100131208	5024	0.397071	1.75e-05	0.00106533
105221694	640	0.397067	1.75e-05	0.00106533
100131208	3814	0.397055	1.75e-05	0.00106564
101929504	323	0.397035	1.75e-05	0.00106629
105221694	4615	0.397029	1.75e-05	0.00106638
105221694	165631	0.397025	1.75e-05	0.00106638
284029	3687	0.396967	1.76e-05	0.00106888
101929340	51146	0.396967	1.76e-05	0.00106888
100131208	2658	0.396948	1.76e-05	0.00106974
284029	3071	0.396855	1.77e-05	0.00107375
100131208	2531	-0.396845	1.77e-05	0.00107403
221883	9610	0.396826	1.77e-05	0.00107487
100131208	2208	0.39672	1.78e-05	0.00108046
84793	22843	0.396674	1.79e-05	0.00108259
101929504	6609	0.396375	1.81e-05	0.00109727
100131208	54921	0.3963	1.82e-05	0.00110035
100131208	23457	0.396237	1.83e-05	0.00110377
84793	55344	0.396223	1.83e-05	0.00110432
105221694	7185	0.396109	1.84e-05	0.0011097
100131208	8539	-0.396102	1.84e-05	0.00110986
100131208	7040	0.396	1.85e-05	0.0011151
284029	23503	0.395959	1.85e-05	0.00111676
100131208	3752	0.395961	1.85e-05	0.00111676
100131208	5068	0.39593	1.86e-05	0.00111793
100131208	4763	0.395894	1.86e-05	0.00111959
100131208	10886	0.395885	1.86e-05	0.0011198
100131208	161502	0.39588	1.86e-05	0.00111981
84793	6839	0.39586	1.86e-05	0.00112047
101929340	119467	0.395821	1.87e-05	0.00112252
100131208	8911	0.395744	1.88e-05	0.00112579
284029	220972	0.395722	1.88e-05	0.00112664
100131067	83595	0.395721	1.88e-05	0.00112664
100131208	7533	-0.395624	1.89e-05	0.00113158
100131208	79184	-0.395532	1.9e-05	0.0011364
100131208	201181	0.395465	1.9e-05	0.00113989
100131208	1633	-0.395435	1.91e-05	0.00114143
84793	54901	0.395394	1.91e-05	0.00114362
100131208	53635	0.395386	1.91e-05	0.00114384
284029	80183	0.39536	1.91e-05	0.00114464
100131208	27146	0.395359	1.91e-05	0.00114464
284029	79770	0.39535	1.91e-05	0.00114494
101929340	54866	0.395326	1.92e-05	0.00114616
100131208	55500	-0.395314	1.92e-05	0.0011466
100131208	9019	-0.395282	1.92e-05	0.00114797
100131208	132204	0.395258	1.92e-05	0.00114916
284029	10462	0.395254	1.92e-05	0.00114916
84793	80975	0.395245	1.93e-05	0.00114943
100131208	9855	0.395222	1.93e-05	0.00115058
284029	165631	0.395199	1.93e-05	0.00115169
100131208	9739	0.395154	1.93e-05	0.00115362
284029	7436	-0.395075	1.94e-05	0.00115789
84793	3925	0.395058	1.94e-05	0.0011584
100131208	51151	0.395062	1.94e-05	0.0011584
100131208	10231	-0.395013	1.95e-05	0.00116061
284029	10225	0.394928	1.96e-05	0.00116452
100131208	113828	0.394917	1.96e-05	0.00116487
100131208	90226	0.394909	1.96e-05	0.00116511
100131208	10473	-0.39472	1.98e-05	0.00117465
101929340	65986	-0.394703	1.98e-05	0.00117521
105221694	6999	0.394702	1.98e-05	0.00117521
100131208	55586	0.394689	1.98e-05	0.00117571
101929504	7499	0.394603	1.99e-05	0.0011808
101929340	11098	0.394556	2e-05	0.00118293
100131208	9476	0.394545	2e-05	0.00118307
101929504	284297	0.394454	2.01e-05	0.00118818
100131208	796	0.394414	2.01e-05	0.00119011
105221694	9873	0.394387	2.01e-05	0.00119153
101929504	10398	0.394344	2.02e-05	0.00119342
100131208	9218	-0.394302	2.02e-05	0.00119555
101929504	85027	0.394289	2.03e-05	0.00119556
105221694	6224	-0.394297	2.02e-05	0.00119556
100131208	80318	0.394205	2.03e-05	0.00119998
100131208	10501	0.394172	2.04e-05	0.00120121
105221694	5371	0.394131	2.04e-05	0.00120358
29034	23394	-0.394009	2.06e-05	0.0012102
101929504	3678	0.393964	2.06e-05	0.00121254
84793	256130	0.393921	2.06e-05	0.00121482
100131067	138241	0.393887	2.07e-05	0.00121658
105221694	284021	0.393851	2.07e-05	0.00121864
284029	149628	0.393811	2.08e-05	0.00122091
284029	4507	-0.393721	2.09e-05	0.00122532
284029	11040	0.393651	2.09e-05	0.0012287
105221694	231	0.393593	2.1e-05	0.00123219
100131208	22931	-0.393535	2.11e-05	0.00123509
100131208	6745	-0.393431	2.12e-05	0.00123983
101929340	7804	-0.39342	2.12e-05	0.00123999
84793	4605	0.393405	2.12e-05	0.0012407
105221694	256586	0.393332	2.13e-05	0.00124459
284029	89932	0.393298	2.13e-05	0.00124628
105221694	8740	0.393298	2.13e-05	0.00124628
84793	3149	0.393226	2.14e-05	0.0012504
284029	50650	0.393138	2.15e-05	0.00125532
100131208	160762	0.393064	2.16e-05	0.00125934
105221694	2635	0.393044	2.16e-05	0.00126037
284029	241	0.393034	2.16e-05	0.00126076
284029	55768	0.393007	2.17e-05	0.00126185
105221694	25939	0.393006	2.17e-05	0.00126185
100131208	5511	-0.392965	2.17e-05	0.00126393
84793	80119	0.392919	2.18e-05	0.00126619
105221694	79668	0.392917	2.18e-05	0.00126619
284029	3682	0.392896	2.18e-05	0.00126701
100131208	26003	-0.392868	2.18e-05	0.0012686
101929504	25959	0.392842	2.19e-05	0.00126975
105221694	9639	-0.392843	2.19e-05	0.00126975
84793	55689	0.392837	2.19e-05	0.00126984
100131067	9830	-0.39282	2.19e-05	0.00127038
100131208	6845	-0.392737	2.2e-05	0.00127532
84793	57678	-0.392721	2.2e-05	0.00127608
284029	126695	-0.3927	2.2e-05	0.00127684
84793	376940	-0.392663	2.21e-05	0.00127822
101929340	2638	0.392667	2.21e-05	0.00127822
100131208	4656	0.392615	2.21e-05	0.00128088
221883	56203	0.392603	2.21e-05	0.00128109
84793	121599	0.39254	2.22e-05	0.00128504
100131208	23111	-0.392514	2.22e-05	0.00128568
100131208	57142	-0.392468	2.23e-05	0.00128732
105221694	169355	0.392469	2.23e-05	0.00128732
284029	6834	0.392429	2.23e-05	0.00128907
100131208	6343	0.392408	2.24e-05	0.00128995
221883	130560	0.392328	2.25e-05	0.00129446
284029	84636	0.392328	2.25e-05	0.00129446
100131067	2218	0.392282	2.25e-05	0.0012961
284029	26999	0.392241	2.26e-05	0.00129744
100131208	220988	-0.39224	2.26e-05	0.00129744
105221694	85363	0.392184	2.26e-05	0.00130096
100131208	10678	-0.392152	2.27e-05	0.00130262
100131208	148870	0.392067	2.28e-05	0.00130721
284029	7293	0.392031	2.28e-05	0.00130938
100131208	23167	-0.391967	2.29e-05	0.00131288
100131208	6869	0.391784	2.31e-05	0.0013237
105221694	64174	0.391752	2.31e-05	0.00132549
105221694	940	0.391633	2.33e-05	0.00133183
105221694	1627	-0.391582	2.33e-05	0.00133475
105221694	9840	0.39153	2.34e-05	0.0013373
105221694	55640	0.391489	2.35e-05	0.00133948
100131208	157777	0.391483	2.35e-05	0.0013396
284029	81788	0.391452	2.35e-05	0.00134068
100131208	1186	0.39145	2.35e-05	0.00134068
100131208	55917	-0.391456	2.35e-05	0.00134068
100131208	201595	-0.391404	2.36e-05	0.00134366
100131208	51026	-0.391212	2.38e-05	0.00135594
84793	83540	0.391196	2.38e-05	0.00135678
29034	6344	0.391163	2.39e-05	0.00135885
84793	203286	0.391024	2.4e-05	0.00136655
100131208	26229	0.390991	2.41e-05	0.00136866
105221694	3676	0.390975	2.41e-05	0.00136926
84793	2176	0.390956	2.41e-05	0.00137023
100131208	83707	0.390922	2.42e-05	0.00137205
100131208	347735	0.390925	2.42e-05	0.00137205
221883	63977	0.390914	2.42e-05	0.00137233
100131208	23678	-0.390874	2.42e-05	0.00137397
84793	164312	0.39086	2.42e-05	0.00137466
101929504	1301	0.390824	2.43e-05	0.00137663
284029	1769	0.390772	2.44e-05	0.00137957
284029	10563	0.390766	2.44e-05	0.00137957
100131208	55601	-0.390754	2.44e-05	0.00138008
284029	8459	0.390697	2.44e-05	0.00138363
101929504	647589	0.390653	2.45e-05	0.00138613
284029	201633	0.390607	2.46e-05	0.00138886
101929504	257019	-0.390596	2.46e-05	0.00138926
284029	8740	0.390569	2.46e-05	0.00139043
101929504	85409	0.390551	2.46e-05	0.00139142
100131208	7932	0.390507	2.47e-05	0.00139368
100131208	2671	0.39049	2.47e-05	0.00139424
100131208	24138	-0.390401	2.48e-05	0.00139985
101929340	11199	0.390396	2.48e-05	0.00139988
284029	8530	0.390363	2.49e-05	0.00140199
221883	1826	0.390335	2.49e-05	0.00140374
100131208	10369	0.390298	2.5e-05	0.00140579
84793	90381	0.390292	2.5e-05	0.0014059
100131067	23107	0.39023	2.5e-05	0.0014095
284029	199786	0.390203	2.51e-05	0.0014112
101929504	1311	0.39018	2.51e-05	0.00141194
105221694	1915	-0.390151	2.52e-05	0.00141344
100131208	3596	0.390124	2.52e-05	0.00141512
100131208	7135	0.39009	2.52e-05	0.00141735
284029	270	0.390082	2.52e-05	0.00141758
100131208	168507	0.390075	2.53e-05	0.00141781
284029	4237	-0.390046	2.53e-05	0.00141873
100131208	23118	-0.390048	2.53e-05	0.00141873
100131208	11085	0.390038	2.53e-05	0.00141898
100131208	259230	-0.390022	2.53e-05	0.00141953
101929504	91461	0.390005	2.53e-05	0.00142045
284029	4818	0.389943	2.54e-05	0.00142456
84793	54913	0.389899	2.55e-05	0.00142679
284029	3431	0.389841	2.56e-05	0.00143078
100131208	5861	-0.389795	2.56e-05	0.00143326
84793	284307	0.389775	2.56e-05	0.0014344
100131208	115353	-0.389736	2.57e-05	0.00143604
84793	4654	0.389721	2.57e-05	0.00143684
100131208	139081	0.389678	2.58e-05	0.00143973
105221694	55707	0.389663	2.58e-05	0.00144057
84793	23551	0.389584	2.59e-05	0.00144453
221883	11199	0.389586	2.59e-05	0.00144453
100131208	51652	-0.389454	2.61e-05	0.00145291
100131208	114801	-0.389452	2.61e-05	0.00145291
100131208	131375	0.389423	2.61e-05	0.00145481
100131208	84464	0.389414	2.61e-05	0.00145488
84793	8317	0.38934	2.62e-05	0.0014585
100131208	85365	-0.389261	2.63e-05	0.00146386
100131067	6330	0.389182	2.65e-05	0.0014686
84793	6258	0.389163	2.65e-05	0.00146944
100131208	10180	0.389163	2.65e-05	0.00146944
284029	90701	0.389013	2.67e-05	0.00147866
105221694	959	0.388952	2.68e-05	0.00148239
101929340	27290	0.388946	2.68e-05	0.00148246
100131208	53917	0.388927	2.68e-05	0.0014836
221883	3206	0.388906	2.68e-05	0.00148396
100131067	23390	0.388712	2.71e-05	0.00149606
101929504	79919	0.388712	2.71e-05	0.00149606
84793	659	-0.388602	2.73e-05	0.0015026
105221694	266747	0.388573	2.73e-05	0.00150425
84793	56992	0.388546	2.73e-05	0.00150533
105221694	9034	0.38855	2.73e-05	0.00150533
100131208	7326	-0.388534	2.74e-05	0.00150534
100131208	81794	0.38854	2.73e-05	0.00150534
284029	51291	0.388521	2.74e-05	0.00150599
100131208	4286	0.388511	2.74e-05	0.00150644
100131208	10489	-0.388494	2.74e-05	0.00150742
84793	995	0.388446	2.75e-05	0.00151025
284029	27106	0.388409	2.75e-05	0.00151283
100131208	3850	0.388364	2.76e-05	0.00151596
84793	8497	0.388342	2.76e-05	0.00151707
105221694	6367	0.388329	2.76e-05	0.00151744
284029	120892	0.388309	2.77e-05	0.00151769
105221694	29802	0.388317	2.77e-05	0.00151769
29034	440836	0.388218	2.78e-05	0.00152387
100131208	10772	-0.388151	2.79e-05	0.00152783
100131208	3428	-0.388146	2.79e-05	0.00152791
105221694	3113	0.388057	2.8e-05	0.00153433
100131067	284058	0.387976	2.82e-05	0.00153941
84793	2200	-0.38794	2.82e-05	0.0015413
105221694	8850	0.387921	2.82e-05	0.00154243
100131208	25853	-0.387908	2.83e-05	0.0015428
100131208	388588	0.387811	2.84e-05	0.00154995
[truncated: 2,197 more rows]
